1                   **Sexual conflict drives micro- and macroevolution of sexual**  
2                                           **dimorphism in immunity**

3                   *Basabi Bagchi*<sup>1\*</sup>, *Quentin Corbe*<sup>2,3\*</sup>, *Imroze Khan*<sup>1\*</sup>, *Ellen Payne*<sup>2\*</sup>, *Devshuvam Banerji*<sup>1</sup>,  
4                   *Johanna Liljestrand-Rönn*<sup>2</sup>, *Ivain Martinossi-Allibert*<sup>2,5</sup>, *Julian Baur*<sup>2</sup>, *Ahmed Sayadi*<sup>2,6</sup>, *Elina*  
5                   *Immonen*<sup>4</sup>, *Göran Arnqvist*<sup>2</sup>, *Irene Söderhäll*<sup>7</sup> & *David Berger*<sup>2†</sup>.

6

- 7                   1. Department of Biological Sciences, Ashoka University.  
8                   2. Department of Ecology and Genetics, Program of Animal Ecology. Evolutionary  
9                   Biology Centre, Uppsala University.  
10                  3. Cavanilles Institute of Biodiversity and Evolutionary Biology, University of Valencia.  
11                  4. Department of Ecology and Genetics, Program of Evolutionary Biology. Evolutionary  
12                  Biology Centre, Uppsala University.  
13                  5. Department of Organismal Biology, Evolutionary Biology Centre, Uppsala University.  
14                  6. Department of Chemistry, Biochemistry, Uppsala University.  
15                  7. Department of Organismal Biology, Program of Comparative Physiology. Uppsala  
16                  University.

17

18                  † Corresponding author: [david.berger@ebc.uu.se](mailto:david.berger@ebc.uu.se)

19                  \*Equal contribution and presented in alphabetical order

20

21                  Short title: Sexual conflict and the evolution of sex differences in immunity

22                  Key words: immunity, sexual selection, sexual conflict, trade-off, mating, sexual dimorphism, sexually  
23                  transmitted disease, phenoloxidase, experimental evolution, *Callosobruchus maculatus*.

24 **Abstract**

25 *Background:*

26 Sexual selection can have major effects on mating rates and sex-specific costs of mating and  
27 may thereby influence sex-differences in immunity as well as associated host-pathogen  
28 dynamics. Yet, experimental evidence linking the mating system to evolved sexual  
29 dimorphism in immunity are scarce and the direct effects of mating rate on immunity are  
30 not well established. Here, we use transcriptomic analyses, experimental evolution and  
31 phylogenetic comparative methods to study the association between the mating system and  
32 sexual dimorphism in immunity in seed beetles, where mating causes internal injuries in  
33 females.

34

35 *Results:*

36 We demonstrate that female phenoloxidase (PO) activity, involved in wound healing and  
37 defence against parasitic infections, is elevated relative to males. This difference is  
38 accompanied by concomitant sex-differences in the expression of genes in the pro-  
39 phenoloxidase activating cascade. We document substantial phenotypic plasticity in female  
40 PO activity in response to mating and show that experimental evolution under enforced  
41 monogamy (resulting in low remating rates and sexual conflict relative to natural polygamy)  
42 rapidly decreases female (but not male) PO activity. Moreover, monogamous females have  
43 evolved increased tolerance to bacterial infection unrelated to mating, implying that female  
44 responses to costly mating may trade off with other aspects of immune defence, an  
45 hypothesis which broadly accords with the documented sex differences in gene expression.  
46 Finally, female (but not male) PO activity shows correlated evolution with the perceived  
47 harmfulness of male genitalia across 12 species of seed beetles, suggesting that sexual

48 conflict has a significant influence on sexual dimorphisms in immunity in this group of  
49 insects.

50

51 *Conclusions:*

52 Our study provides insights into the links between sexual conflict and sexual dimorphism in  
53 immunity at the molecular and phenotypic level and suggests that selection pressures  
54 moulded by mating interactions can lead to a sex-specific mosaic of immune responses with  
55 important implications for host-pathogen dynamics in sexually reproducing organisms.

56

## 57 **Introduction**

58 Sex differences in immunity are widespread across animal taxa (1–4) and are believed to  
59 reflect sex-specific selection and sexually dimorphic life histories (5–13). Sexual dimorphism  
60 in immunity may have important consequences both for sex-specific rates of reproduction  
61 and survival, with potential impact on population demography (14–18), and for the spread of  
62 pathogens. For example, distinct male and female immune systems present more diverse  
63 host targets (1,19,20) and this may influence both disease transmission, infection rates and  
64 the expression and evolution of pathogen virulence (5,16–18,21–29).

65

66 Investment in immune defence is costly. These costs have most often been observed as  
67 reductions in fecundity, effectively translating into reproduction-survival trade-offs in the  
68 presence of pathogens (9,10,12,22,30–34). In polygamous species, where sexual selection on  
69 males is intense, females are often predicted to gain more than males from investing in  
70 survival and longevity at the cost of current reproduction and mating effort (3,9,35) and are  
71 therefore also predicted to invest more in immunity than males (but see: (2,10,24,35–37)).

72 Sexual selection may also have pronounced direct effects on optimal investment in  
73 immunity, as it may dictate the economics of reproduction (23,27,38,39) and lead to  
74 elevated mating rates (40), which in turn may increase disease transmission (16,24,25,28).

75 Indeed, it has been suggested that sexual dimorphism in immunity should increase with sex-  
76 differences in optimal mating rates and the strength of sexual selection  
77 (5,13,21,23,27,41,42).

78

79 The effects of sexual selection on sex-differences in immune investment may be magnified in  
80 systems where mating is harmful for females, through costs such as the transfer of

81 pathogens during mating, transfer of immunosuppressive seminal fluid substances, or direct  
82 physical injury (23,28,43–45). Such male-imposed mating costs are believed to be results of  
83 sexual conflict driven by the different evolutionary interests of the sexes (6–8,46), in which  
84 male adaptations evolve to increase reproductive success in competition with other males  
85 despite impairing the health of their female mating partners. Females, in turn, evolve  
86 counter-adaptations to alleviate the harm inflicted by males resulting in a coevolutionary  
87 arms race between the sexes (23,43,46,47). Female immune responses may represent one  
88 type of such counter-adaptation (23,27,48,49). This suggests that infections or harm on  
89 females, induced by sexually selected male mating strategies, may be a significant selection  
90 pressure on female immunity in polyandrous taxa (21,24,27,41,50). Hence, the evolution of  
91 sexual dimorphism in immunity may in part be a result of male-imposed costs of mating in  
92 females.

93

94 Yet, whether and how sexual conflict, or just mating *per se*, affect tissue-specific and general  
95 immunity in the sexes is not well understood (5,22,23,44,51). It has, for example, been  
96 suggested that tissue-specific (i.e. in the reproductive tract) immune responses upon mating  
97 can lead to allocation trade-offs with systemic immunity (44,52), but few studies have  
98 provided direct experimental evidence for a causal link between the mating system and the  
99 evolution of sex-specific immunity trade-offs (2,37,49,50,53). To fill this empirical void, we  
100 assessed how variation in the intensity of sexual conflict and mating rates in the seed beetle  
101 *Callosobruchus maculatus* affects i) the evolution of male and female phenoloxidase (PO)  
102 activity, a major component of invertebrate immunity involved in wound healing and  
103 encapsulation of pathogens (54,55), and ii) associated immunopathological consequences of  
104 bacterial infections unrelated to mating.

105

106 Sexual selection is intense in *C. maculatus*, including both pre- and post-copulatory  
107 processes (56–61), leading to sexual conflict over optimal mating rate and to male traits that  
108 cause harm in females during mating (59,60,62,63). The male genitalia carry spines and  
109 males with longer spines have greater fertilization success but the spines cause internal  
110 injuries in females during mating, leaving females with melanized scars in the reproductive  
111 tract as a result of the wound-healing process (59,60,62). Injurious copulations are wide-  
112 spread in insects and may serve several functions, with the ultimate aim to increase male  
113 competitive fertilization success (64,65). This may select for increased immune defence  
114 locally in the female reproductive tract to enable efficient wound healing and limit female  
115 susceptibility to sexually transmitted pathogens (66). Here, we show that PO activity in *C.*  
116 *maculatus* females is high (see also: (48)) and responds dynamically to mating, while it is  
117 very low in males. These sex differences are also mirrored in the expression of several key  
118 genes regulating PO activity and related immune reactions. Experimental removal of sexual  
119 selection and conflict led to rapid laboratory evolution of decreased female (but not male)  
120 investment in PO activity. These changes were accompanied by the evolution of increased  
121 female tolerance to bacterial infection unrelated to mating, suggesting a trade-off between  
122 female responses to harmful mating and tolerance to other infections. The PO response was  
123 paralleled at a macroevolutionary scale, signified by correlated evolution between male  
124 genital morphology and sexual dimorphism in PO activity across 12 species of seed beetles.

125

126

## 127 **Results**

### 128 ***Mating status and sex-biased gene expression in the prophenoloxidase-activating cascade***

129 The prophenoloxidase (proPO) activating cascade leads to the production of active PO,  
130 which serves as an important defence in invertebrates against pathogenic bacteria, fungi and  
131 viruses (54,55,67,68). Additionally, proPO has been implicated in cuticle tanning and other  
132 developmental processes, as well as reproduction (reviewed in: (54,55,68)). PO aids in  
133 wound healing and encapsulation of parasitic infections, and killing of pathogens by  
134 generation of toxic secondary metabolites, such as reactive oxygen species (54,55,68–73).  
135 However, the production of PO is strictly regulated (74,75) as it is both energetically costly  
136 and the generation of toxic secondary metabolites can cause self-harm via  
137 immunopathological responses (68,73,76,77), predicting that investment in PO activity could  
138 incur costs to other fitness related traits (22,55,68,73). In Figure 1a we delineate the general  
139 hypothesis for relationships between key components of the proPO cascade based on  
140 functional annotations in insects and other invertebrates (reviewed in: (54,55,67,68,78)). To  
141 gain insights into how sexual selection and conflict may affect investment in PO and other  
142 correlated immunity traits in *C. maculatus*, we explored sex-biased gene expression of five  
143 orthologs mapping to sequences of proteins functionally annotated for these key  
144 components (Supplementary Table 1, Figure 1b). Spätzle processing enzyme (SPE) is involved  
145 in the processes that cleaves proPO into active PO. We found that the expression of the *C.*  
146 *maculatus* orthologs of both SPE and proPO are significantly female-biased in virgin adults.  
147 Mating increased transcription of proPO in males leading to similar expression levels in the  
148 sexes, whereas expression of SPE tends to increase in both sexes post mating and remains  
149 female-biased (Figure 1b, Supplementary Table 1). These results suggest that females invest  
150 heavily in PO activity via SPE and proPO. SPE also initiates the modification of spätzle (SPZ)

151 and downstream TOLL-regulated antimicrobial peptides (AMPs), which offer inducible  
152 immunity to pathogens. This may thus set the stage for a trade-off between PO  
153 (encapsulation and wound healing) and SPZ (AMP-production) (see: e.g. (79,80) (Figure 1a).  
154 Overactivation of the proPO cascade may also lead to the production of toxic secondary  
155 metabolites (68,73), suggesting that excessive signalling via SPE to produce high levels of  
156 both SPZ and PO may come at a cost to overall health (76,77). Interestingly, production of  
157 serine protease inhibitors (serpins) via the TOLL-pathway exerts negative feedback and  
158 control over the proPO cascade (81), and orthologs of both SPZ and the two putative serpins  
159 that we identified in *C. maculatus* had strong male-biased expression (Figure 1b,  
160 Supplementary Table 1). These patterns in gene expression thus suggest a putative  
161 functional basis for sex-specific immunity via the pro-PO activating cascade, where we  
162 hypothesize that females (relative to males) should invest more in PO activity in their  
163 reproductive tract in response to harmful mating and the need for wound healing, but that  
164 this investment might come at the potential cost of reduced AMP-production and/or toxic  
165 side-effects of overactivation of the proPO cascade.

166 [FIGURE 1]

167

### 168 ***Sex-specific regulation of phenoloxidase activity***

169 We measured PO activity in homogenized whole-body samples of male and female larvae,  
170 pupa and adults. The three life stages showed significant differences in mass-corrected PO  
171 activity averaged across the sexes ( $F_{2,33} = 17.7$ ,  $p < 0.001$ , Figure 2a). Some larvae showed  
172 detectable levels of PO activity. Since we could not determine the sex of the larvae, sex-  
173 differences in the larval stage can neither be confirmed nor rejected. Neither male nor  
174 female pupae showed measurable levels of PO activity, whereupon there was a drastic and



175 female-limited up-regulation in the virgin adults. Strikingly, virgin males did not show any  
176 PO-activity, which was also the case for mated males (see further below), despite clear  
177 expression of the proPO gene in males, especially following mating (Figure 1b). It seems that  
178 proPO is not converted to PO in males to the same extent that it is in females, and other  
179 proteins such as proPO activating factors (PPAFs), for which we could not confidently  
180 identify gene transcripts, might be involved in regulating sex differences in how proPO is  
181 converted into active PO. The observed effect size of sex on PO activity in virgin adults was,  
182 Hedges'  $g = 2.08$ , which is high relative to what is typical in insects (mean Hedges'  $g = 0.55$ ;  
183 see (2)) and for animals in general (mean Hedges'  $g = 0.39$ ; see (2)).

184

185 To further understand the function of the female-bias in adults, we explored how female PO  
186 activity responds to mating. We mated females either only on day one of adult life  
187 (treatment 100), on day one and two (110), on day one and three (101), or on all days (111)  
188 and measured levels of PO activity subsequently on the third day (2h post mating in 101- and  
189 111 females; ca. 24 and 48h post mating in 110- and 100 females, respectively). The  
190 differences among the four treatments were substantial ( $F_{3,52} = 18.7$ ,  $p < 0.001$ ,  
191 Supplementary Table 2). The PO activity was high in females when some time had elapsed  
192 between mating and PO measurement (i.e. 100- and 110-females), while the levels were  
193 near zero when PO activity was measured directly after mating (i.e. 101- and 111 females)  
194 (Figure 2b). The treatment groups described above represent non-random samples of  
195 females, as not all females can be made to remate on a given day. We therefore also  
196 conducted a second experiment with random samples of 100 and 001 females. This showed  
197 that the two treatments differed significantly (Mann-Whitney U test:  $W = 15$ ,  $p < 0.001$ ); 001  
198 females had PO activity close to zero similar to 101 and 111 females in the first experiment,

199 whereas 100 females had high PO activity similar to virgins, 100 and 110 females of the first  
200 experiment (Figure 2). Hence, female PO activity decreases after mating but can be rapidly  
201 recovered to initial levels post mating. These results accord with the observed female  
202 upregulation of SPE in response to mating and the unconditionally high expression of proPO  
203 in the female abdomen (Figure 1b, SI Table 1).

204 [FIGURE 2]

205

206 Using a subset of 25 females from the same population and same generation as the first  
207 experiment, we performed a subsequent analysis of PO activity in oviposited eggs. This  
208 analysis showed that decreases in female PO activity following mating is not due to PO  
209 investment in offspring, as all five samples of pooled eggs showed very low (undetectable)  
210 levels of PO activity, despite each sample representing about half of the lifetime egg  
211 production of a single female. We found no evidence of a reproduction-immunity trade-off  
212 as there was no relationship between the number of eggs laid by the females over the two  
213 days of the first experiment and their subsequent measure of PO activity (Supplementary  
214 Table 2). Although immunity-reproduction trade-offs are readily observed in insects  
215 (9,12,13,22), PO investment does not always correlate negatively with fecundity (e.g.  
216 (82,83)). Moreover, variation in overall phenotypic and genetic condition (84,85), as well as  
217 the amount of male harm inflicted on females (86), could have masked a putative trade-off.  
218 Alternatively, trade-offs with PO investment could materialize for other life-history traits  
219 (9,30,87), and/or other components of immunity (22,55) (see: Figure 1a and further below).

220

221 ***Experimental evolution of phenoloxidase activity under different mating systems***

222 To directly test the hypothesis that sexual selection and conflict over mating is causing the  
223 observed sexual dimorphism in immunity in *C. maculatus*, we compared the levels of PO  
224 activity in males and females from replicate experimental evolution lines maintained for 27  
225 generations under one of three alternative mating regimes; natural **polygamy** (natural  
226 selection and sexual selection – multiple mating); enforced **monogamy** (natural selection but  
227 excluding sexual selection – single mating); and **male-limited selection** (applying sexual  
228 selection but relaxing natural selection– multiple mating but female coevolution to reduce  
229 male harm prevented). The lines are further described in the *Methods* section and in  
230 (63,88,89). We predicted that females from polygamous lines that had evolved under  
231 frequent multiple mating would invest more in PO activity than females from monogamous  
232 lines, while the male-limited lines reveal the extent to which female PO activity may change  
233 in the polygamous mating system via genetic correlation when selection acts mainly via  
234 males. We also tested whether the direct effect of mating and reproduction on PO activity  
235 had evolved under the different mating systems by for all lines comparing PO activity of  
236 virgin and socially naïve individuals to that of beetles allowed to mate and reproduce for 48  
237 hours in groups of 5 males and 5 females prior to the PO measurements.

238

239 We analysed the effects of experimental evolution regime crossed by mating treatment in  
240 Bayesian mixed effect models using the MCMCglmm package (90) for R (91). Experimental  
241 evolution line replicates, crossed with mating treatment, were included as random effects  
242 (priors and model specification in Supplementary 3). The mating treatment decreased body  
243 mass relative to the virgin treatment, revealing a sizeable investment in reproduction by  
244 both sexes (SI Table 3a). While males did show an up-regulation of proPO gene expression in  
245 response to mating (Figure 1b), they did not have any detectable levels of PO activity (n =

246 354, SI Table 3c), confirming that PO investment is strongly female-biased in the adult stage  
247 in *C. maculatus* (63). In females (N = 358 assays), the mating treatment significantly  
248 decreased PO activity ( $\Delta PO = -0.029$  (-0.022; -0.037),  $P_{\text{MCMC}} < 0.001$ ) but this effect was  
249 similar in the three selection regimes (all pairwise interactions  $P_{\text{MCMC}} > 0.6$ ) (Figure 3).  
250 Importantly, evolution without sexual conflict under the monogamy regime had led to a  
251 general decrease in female PO activity relative to the polygamy regime ( $\Delta PO = -0.010$  (-  
252 0.002; -0.018),  $P_{\text{MCMC}} = 0.030$ ), confirming a key prediction. The monogamy regime also  
253 showed lower levels of PO activity compared to the male-limited regime, where females had  
254 been kept under relaxed selection ( $\Delta PO = -0.011$  (-0.004; -0.020),  $P_{\text{MCMC}} = 0.012$ ).  
255 Accordingly, the polygamy and male-limited regime had similar levels of PO activity ( $P_{\text{MCMC}} >$   
256 0.8, Figure 3). Thus, as the expected number of matings decreased to a single mating in the  
257 monogamy regime, the optimal female strategy was to decrease PO activity, in support of  
258 the hypothesis that PO investment is costly and likely trades off against other female fitness  
259 components (22,50,55,68,92). If immune defence is costly, a corollary from allocation theory  
260 is that polygamous females should invest in PO in relation to their total energy reserves and  
261 expected number of partners. In contrast, among monogamous females we expect the  
262 evolution of decreased condition dependence due to their reduced need for PO activity. This  
263 is also what we find; there was a positive relationship between female body mass and PO  
264 activity in polygamous lines (slope = 0.011 (0.005; 0.016),  $P_{\text{MCMC}} < 0.001$ ), whereas this  
265 relationship was absent in monogamous lines ( $P_{\text{MCMC}} = 0.48$ ), and this regime-difference in  
266 the condition dependence of PO investment was significant ( $\Delta \text{slope} = 0.007$  (0.001; 0.013),  
267  $P_{\text{MCMC}} = 0.026$ , Figure 3).

268 [FIGURE 3]

269

270 Again, however, a fecundity cost of high PO activity was not apparent when comparing  
271 regimes; offspring production in the reproducing treatment was higher for females from the  
272 polygamy regime (showing higher levels of PO activity) than for monogamous females (with  
273 lower levels of PO activity) (SI Table 3b).

274

### 275 ***Experimental evolution of the response to bacterial infection***

276 To explore other possible immunological consequences of mating system and sexual conflict,  
277 which could be driven by trade-offs between investment in PO and other components of  
278 immunity (Figure 1), we measured survival in the monogamy and polygamy lines when  
279 exposed to bacterial infection in abdominal tissue adjacent to the reproductive tract.  
280 Females (total n = 1060, 24-48h past adult eclosion) were either virgin or mated prior to  
281 being infected with one of two doses (OD1 or OD2) of the entomopathogenic gram-positive  
282 bacteria, *Bacillus thuringiensis*, or a sham control (pricking with a sterilized needle dipped in  
283 PBS buffer). We analysed survival in mixed effects Cox proportional hazard models using the  
284 coxme package (93) for R, with regime and mating treatment as fixed effects and replicate  
285 lines as random effects. We also confirmed results by using the MCMCglmm package (90) to  
286 apply Bayesian mixed effect models on a binomial response variable (dead/alive on day 5  
287 post infection), which allowed us to add fully crossed random effects (line by treatment) in  
288 the analysis (Full statistical summaries in Supplementary Tables 4a, b).

289

290 Females from the polygamy regime showed lower survival under bacterial infection  
291 compared to females from the monogamous regime ( $X^2_2 = 13.7$ ,  $P = 0.001$ , Figure 4a-d). This  
292 result, albeit correlative, is in line with the hypothesis that the evolution of female immunity  
293 responses to expected harmful mating may trade-off against general susceptibility to

294 infection. Mating by itself led to an increase in mortality ( $X_1^2 = 63.6$ ,  $P < 0.001$ ). However,  
295 there was no significant effect on susceptibility to infection of either mating status ( $X_2^2 = 1.2$ ,  
296  $P = 0.56$ ) or the interaction between evolution regime and mating status ( $X_2^2 = 0.14$ ,  $P =$   
297  $0.93$ , Figure 4a-d). Although somewhat surprising, this result is not inconsistent with a trade-  
298 off between female PO investment in the reproductive tract and vulnerability to systemic  
299 infection caused by other pathogens, as also virgin females display high PO activity and high  
300 expression of genes in the proPO cascade prior to being mated (Figures 1b & 2). Virgin males  
301 from monogamous and polygamous regimes (which do not seem to invest in PO at all) did  
302 not show any strong differences in their response to bacterial infection (assessed in a  
303 separate experiment,  $X_2^2 = 0.94$ ,  $P = 0.63$ , Figure 4e,f). However, although we analyzed the  
304 same number of evolution lines in the male experiment, the total number of individuals  
305 analyzed was smaller ( $n = 270$  for virgin males compared to  $n = 493$  for virgin females),  
306 limiting direct comparisons between the male and female assays. Nevertheless, the male  
307 experiment did reveal an overall effect of the bacterial injection ( $X_2^2 = 7.77$ ,  $P = 0.021$ ) and  
308 significantly greater survival of polygamous males ( $X_2^2 = 6.63$ ,  $P = 0.010$ ) (SI Table 4c).

309

310 To gauge the generality of these results, and to further investigate whether the higher  
311 survival of monogamous females under bacterial infection was due to more efficient  
312 clearing of the bacterial infection (greater resistance), or because they were better at  
313 withstanding it (greater tolerance) (94), we infected once-mated polygamous and  
314 monogamous females with the gram-negative bacteria *Pseudomonas entomophila* using the  
315 same protocol as described above. The *P. entomophila* strain used is resistant to the  
316 antibiotic ampicillin. This allowed us to screen a subset of females collected 12h post start of  
317 infection exclusively for *P. entomophila* by culturing female cell tissue on Luria agar plates

318 with ampicillin. Again, females from the polygamy regime showed higher susceptibility to  
319 bacterial infection ( $X^2_2 = 16.6$ ,  $P < 0.001$ , total  $n = 288$ , Figure 4g,h, SI Tables 4d,e). However,  
320 there was no significant difference in bacterial load among the evolution regimes ( $P_{\text{MCMC}} >$   
321  $0.2$ ,  $n$  samples = 63,  $n$  females = 189, Figure 4i, SI Table 4f), suggesting no large differences in  
322 the ability of females to clear the bacterial infection. This last result does not support an  
323 allocation trade-off between the production of PO and AMPs, and may be more consistent  
324 with increased mortality due to toxic secondary metabolites resulting from overexpression  
325 of the proPO activating cascade by polygamous females (68,75–77) (Figure 1a). However,  
326 more work is needed to pin-point the exact mechanism underlying the differential mortality  
327 among monogamous and polygamous females. More generally, our results are consistent  
328 with the hypothesis that sexual conflict and harmful mating can lead to increased  
329 vulnerability to infection in females as a result of sex-specific trade-offs between different  
330 components of immunity (23,44,52).

331 [FIGURE 4]

332

### 333 ***Correlated evolution between female PO activity and male genital morphology***

334 We explored whether macroevolutionary transitions in sexual dimorphism in immunity could  
335 be driven by the evolution of mating interactions and the harmful morphology of male  
336 genitalia in this group of insects (23). We measured PO activity in virgin males and females of  
337 12 species of seed beetles. There was pronounced sexual dimorphism and female-limited  
338 expression in many species (SI Figure 5a). To quantify harmfulness of the male genitalia in  
339 each species, we asked two expert and ten naïve biologists to rate pictures of male genitalia  
340 for the perceived harm they cause in the female reproductive tract (SI Figure 5b).

341 Importantly, earlier work has shown that male harm assayed in this manner correlates  
342 positively with the amount of scarring that occurs in the female copulatory tract after mating  
343 (23). Species differences explained 61% of the total variation in rater scores and scores were  
344 highly correlated between experienced and naïve raters ( $r = 0.83$ ), suggesting that raters  
345 generally agreed on the classification of male harm. Female and male PO activity, as well as  
346 male harm, showed moderate phylogenetic signals (Blomberg's  $K = 0.68, 0.52$  and  $0.54$ ,  
347 respectively (95)). Hence, we applied a phylogenetic generalized least squares regression  
348 (PGLS) based on species means using the *ape* package (96) for R, accounting for phylogenetic  
349 dependencies using Orlstein-Uhlenbeck estimation and an extant seed beetle phylogeny  
350 (97,98). There was significant positive covariance between male harm and female PO activity  
351 ( $\alpha = 6.70$ , standardized slope =  $0.83$ ,  $df_{12,10}$ ,  $P < 0.001$ , SI Table 5a). Moreover, the covariance  
352 between male harm and male PO activity was not significant and opposite in sign ( $\alpha = 2.92$ ,  
353 standardized slope =  $-0.57$ ,  $df_{12,10}$ ,  $P = 0.08$ , SI Table 5b). These analyses, together with our  
354 experimental findings, implicate sexual conflict as a driver of macro-evolutionary divergence  
355 in sexual dimorphism in immunity (Figure 5).

356 [FIGURE 5]

357

## 358 Discussion

359 Sexual selection can result in increased male harm to females during mating (22,29,32),  
360 either through direct injury or infection with pathogens, and this should in theory favour  
361 increased female investment in immunity when female lifetime reproductive success is  
362 elevated by increased longevity (5,22–24,27,35,39). Here, we provide a suite of experimental  
363 and comparative data collectively showing that sex-differences in immunity can be  
364 modulated by sexual conflict in a species where costs of mating are conspicuous. This



365 conclusion is based upon observations of (1) sex-biased expression of genes in the proPO  
366 activating cascade (Figure 1), (2) a female-bias in PO activity which is substantially higher  
367 than what is typical in insects, (3) female-limited phenotypic plasticity in PO activity in  
368 response to mating (Figure 2), (4) female-limited microevolutionary changes in immunity  
369 traits in response to experimental manipulation of the mating system and hence sexual  
370 conflict (Figures 3 & 4), and (5) correlated evolution between male genital morphology and  
371 female PO activity across species (Figure 5).

372

373 While previous studies have quantified female immune responses post mating  
374 (5,5,22,23,45,50,53,99,100), it often remains unclear whether male harm via genitalia or  
375 ejaculatory compounds (i.e. sexual antagonism) drive such responses, or whether they  
376 represent independent female optimization of the trade-off between current and future  
377 reproduction (5,22,23,27,49,101). Here, we directly manipulated the level of sexual selection  
378 and conflict, which is relatively well understood in *C. maculatus* (e.g. (47,48,59,62,102–105)),  
379 and found a clear female-limited PO response, while no correlation between female  
380 reproductive investment and PO activity was detected. Hence, our data point to male harm  
381 inflicted during mating as the driver of female PO investment. In this system, the inflicted  
382 harm by a male on his female mating partner is positively correlated to his success in sperm  
383 competition (29), presumably because seminal fluid substances (66) that benefit males in  
384 sperm competition (62) pass more rapidly into the female body if the copulatory duct is  
385 ruptured (32). However, these wounds may leave females at a risk of systemic infection with  
386 pathogens (36), suggesting a need for healing these injuries via a PO-mediated, potentially  
387 costly (68,73,76,77), reaction.

388

389 We hypothesized that these effects could have consequences for female susceptibility to  
390 infections unrelated to mating via trade-offs between PO activity and other components of  
391 immunity in the prophenoloxidase activating cascade, such as the production of AMPs (Figure  
392 1). This prediction was offered correlative support by the observation of increased  
393 susceptibility to bacterial infection in females from the polygamous mating regime (Figure  
394 4). However, our results do not allow us to confidently distinguish between several, mutually  
395 inclusive, hypotheses regarding the exact mechanistic basis for the increased mortality of  
396 polygamous females. We did not find a difference in bacterial load between polygamous and  
397 monogamous females infected with the gram-negative bacteria *P. entomophila*, suggesting  
398 no large differences in the ability to clear infection and therefore also no large differences in  
399 the production of AMPs used to fight bacterial infection; a result that does not support a  
400 trade-off between the production of AMPs and PO in polygamous females. The result from  
401 this experiment is hardly conclusive, however. Another possibility is that the need for high  
402 PO activity in the reproductive tract of polygamous females led to a harmful “overactivation”  
403 of the proPO activating cascade upon bacterial infection and the simultaneous need for AMP  
404 production (e.g. (106)). Indeed, while such overactivation could mask allocation trade-offs by  
405 attending the dual need of producing PO and AMPs, it may have caused an inflammatory  
406 response with increased mortality of polygamous females as a result. The proPO activating  
407 cascade can have detrimental immunopathological consequences via the production of toxic  
408 secondary metabolites and needs to be strictly regulated (76), and severe bacterial infection  
409 can kill the organism also via side-effects of excessive melanization (68,73). Future  
410 experiments are needed to pin-point the exact mechanistic basis underlying our results,  
411 preferably including detailed measures of tissue-specific immunity responses as we here  
412 measured whole-body samples.

413

414 Interestingly, polygamous females suffered increased mortality when infected with gram-  
415 positive and gram-negative bacteria, with only the former considered important in activating  
416 immune responses via TOLL, while the latter is thought to elicit immune responses mainly  
417 via the Imd pathway (78), which does not have a clear connection to the proPO activating  
418 cascade. This result might thus speak against immunity trade-offs between components in  
419 the proPO activation cascade as a general mechanism explaining the observed differential  
420 mortality between polygamous and monogamous females. However, several studies on  
421 invertebrates have now demonstrated cross-talk between the TOLL and Imd pathway  
422 ((55,78,107–109)), and that the proPO cascade can be readily activated by gram-negative  
423 bacteria (74,109,110). Indeed, TOLL has even been directly implicated in regulating sexual  
424 dimorphism in immunity to gram-negative bacteria in fruit flies (111), suggesting that the  
425 consistent difference in mortality of monogamous and polygamous females infected with  
426 the gram-positive *B. turingiensis* and gram-negative *P. entomophila* may yet be rooted in  
427 differential usage of the proPO activating cascade.

428

429 Male reproductive success in polyandrous mating systems is typically maximized by a shift  
430 towards current reproduction in the female mating partner, as this would increase the  
431 likelihood of the male siring a larger fraction of the offspring produced by the female  
432 (5,16,23,24,44). These ideas predict that males should evolve to manipulate females to  
433 invest in current reproduction at the expense of reduced immunity and longevity (22,23). In  
434 line with these predictions, males with longer genital spines, that inflict more harm during  
435 mating, sire more offspring in *C. maculatus* (59,62) and seem to stimulate female fecundity  
436 (*unpublished data*). Moreover, the male ejaculate regulates female immunity post mating in

437 *Drosophila*, guppies, mice and humans (44,45,51,52,112,113), although it often remains  
438 unclear to what extent the effects are detrimental or beneficial to the female overall  
439 (5,22,23,27,114). It has even been suggested that males may gain fitness benefits by  
440 transferring sexually transmitted diseases that trigger shifts in female allocation towards  
441 current reproduction (21,115), but this possibility lacks empirical support (116). In other  
442 insects, female PO either increases or decreases post mating and it has been suggested that  
443 in species where mating downregulates female PO activity, males corrupt the female  
444 immune function (23). While our results do not refute this hypothesis, they are also  
445 consistent with *C. maculatus* females being “primed” for harmful mating and that PO activity  
446 in females initially decreases post mating as a result of wound healing but is then quickly  
447 restored. Such female anticipatory immunity activation has been observed in *Drosophila*  
448 (117,118) and bed bugs (119).

449

## 450 *Conclusions*

451 When mating rate affects both sexual dimorphism in immunity and infection rates, this can  
452 result in intricate eco-evolutionary dynamics with demographic consequences for both host  
453 and pathogen (5,16,21–25,27). Our study suggests that sexual conflict over mating rate can  
454 drive sexual dimorphism in immunity and that allocation to different components of  
455 immunity may play an important role in mediating effects of mating on females. In  
456 *Drosophila*, mating increases immune responses in reproductive tissue, and in most insects  
457 mating decreases general immunity, but causality typically remains unclear (22,23). Our  
458 results imply that baseline PO activity decreases in *C. maculatus* females as a genetic  
459 response to the alleviation of sexual conflict and harmful mating. Moreover, monogamous  
460 females, that evolved a reduced investment in PO activity relative to naturally polygamous

461 females, showed an associated evolutionary increase in tolerance to bacterial infection in  
462 abdominal tissue adjacent to the reproductive tract, effects not seen in their conspecific  
463 males. This suggests that sex-specific trade-offs determine the mosaic of immune  
464 investment and that sexual selection and conflict affect the economics of these trade-offs.  
465 This complexity may explain some of the discrepancies found in the literature concerning  
466 female immune responses to mating (reviewed in: (5,23,27)) and motivates further  
467 explorations of the selection pressures affecting sexual dimorphism in immunity.

468

## 469 **Methods**

### 470 ***Study populations***

471 *Callosobruchus maculatus* females lay eggs on seeds and larvae burrow into the seed where  
472 the entire development occurs. Beetles emerging from seeds are reproductively mature and  
473 require neither water nor food to reproduce successfully (e.g. (120,121). Adults typically die  
474 7-14 days after emergence in the absence of food or water (e.g.(122). All experiments used  
475 beetles originating from a genetic stock that was originally sampled in Lome, Togo, in 2010,  
476 and subsequently maintained as 41 isofemale lines in the laboratory to maintain the genetic  
477 variation present in the original population (123), before being mixed into a large, outbred,  
478 and genetically diverse experimental population (N ~500). This genetic stock has been used  
479 in quantitative genetic designs (e.g. (102,123–125), artificial selection experiments (126),  
480 and experimental evolution (63,88,89) to demonstrate substantial sex-specific standing  
481 genetic variation in behavior, morphology, life-history and life time reproductive success, as  
482 expected given that the lines originate from the center of the species range (127).

483

484 The experimental evolution lines used to study the effect of the mating system on the  
485 evolution of sexual dimorphism in immunity are thoroughly described in (63,88). In brief, the  
486 lines were maintained under standard temperature (29°C), humidity (50%RH) and light cycle  
487 (12L: 12D), and were reared on the preferred host plant (127) *Vigna unguiculata* (black-eyed  
488 bean). There are three replicate “Monogamy” lines, three “Polygamy” lines and two  
489 replicate “Male-limited” lines. Effective population size for the lines in each regime was kept  
490 approximately equal ( $N_e \approx 150$ ;  $N_{\text{Male-limited}} = 200$ ,  $N_{\text{Monogamy}} = 246$ ,  $N_{\text{Polygamy}} = 300$ ) and the  
491 number of beans provided as egg laying substrate in each regime was standardized to give  
492 the same, relatively low, juvenile density (2-4 eggs/bean) to minimize (and equalize) larval  
493 competition (63). To implement the different regimes, selection was only applied for the first  
494 two days of adult life. However, the reproductive output over these first days typically  
495 corresponds to half of the total lifetime reproductive output (D. Berger, unpublished data).  
496 The regimes show differences consistent with generally positive effects of sexual selection  
497 on genetic quality in terms of increased female reproductive success and population  
498 productivity in polygamy lines relative to monogamy lines at generations 16 and 20,  
499 respectively (63). They also show differences in sexually selected male pre- and post-  
500 copulatory traits (88,89).

501

### 502 ***Expression of genes involved in the proPO activating cascade***

503 To assay the effects of sex and mating status on the expression of relevant genes, we used  
504 data previously published in (128). Briefly, RNA sequencing (Illumina TruSeq) was used to  
505 test for sex differences in gene expression in virgin and mated age-matched beetles,  
506 separately for reproductive and non-reproductive tissues (i.e. abdomen and head & thorax,  
507 respectively). In the mating treatment, RNA was extracted 24h after mating. We pooled six

508 individuals of each sex, tissue and treatment and replicated these pools three times. The  
509 transcriptome was assembled *de novo* (129), and differential expression analysed using  
510 edgeR, as described in(128). The candidate PO genes were detected using BLAST (tblastn  
511 search in the TSA database for *C. maculatus*, using the protein sequences as query) and here  
512 we report the ones with a significant sex difference in expression (with a false discovery rate  
513 adjusted p-value < 5%) in the virgin beetles in either tissue category.

514

### 515 ***Phenoloxidase assays***

516 Individual beetles were homogenized by 20 seconds of grinding with a pestle in an  
517 Eppendorf tube containing 20  $\mu$ l Phosphate Buffered Saline (PBS). Samples were kept on ice  
518 until centrifuged at 17g for 10 min at 0°C, and the supernatants (10  $\mu$ l) were stored at -80°C  
519 prior to the assay of PO activity. The frozen homogenates were analysed by an investigator  
520 uninformed of the samples' identity and treatment affiliation, i.e as blind tests. Due to the  
521 small volume of each sample and high background due to the crude protein extract, the  
522 assay was first developed and optimized to ensure that proper enzyme kinetics were at  
523 hand, and phenylthiourea could completely block the activity (see Supplementary  
524 Information 6). In preliminary experiments the beetle homogenate was preincubated with  
525 curdlan (a  $\beta$ -1,3-glucan), trypsin or chymotrypsin to fully convert all zymogenic proPO to the  
526 active enzyme PO before assay of enzyme activity. However, the frozen homogenates did  
527 not show any increased PO activity after activation, indicating that the preparation method  
528 such as freezing at -80°C had converted all proPO into active enzyme PO (Supplementary  
529 Information 6). Dopamine, L-Dopa and 4-methylcatechol+hydroxyproline ethyl ester were  
530 each tested as substrate for *Callosobruchus* PO, and dopamine was shown to be the most  
531 efficient substrate and was used in the further experiments (rough estimates of Km in this

532 crude homogenate for L-dopa  $K_m \approx 6.3$  mM, and for dopamine  $K_m \approx 0.2$  mM, while 4-  
533 methylcatechol + hydroxyproline ethyl ester as substrate did not show linearity). For the  
534 experimental samples, six samples of beetle homogenate at a time were randomly chosen  
535 and thawed. After thawing, each individual beetle homogenate (3  $\mu$ l) was incubated  
536 together with 7  $\mu$ l PBS and 50  $\mu$ l dopamine [10 mM in H<sub>2</sub>O] at 22°C. The reaction proceeded  
537 for 15 minutes after which 60  $\mu$ l H<sub>2</sub>O was added to terminate the reaction and after  
538 centrifugation at 16000 x g for 1 min the absorbance at 420 nm was recorded. The enzyme  
539 assay was first developed to ascertain zero order kinetics, and due to the crude source of  
540 enzyme individual blank controls (without substrate) had to be measured before and after  
541 the reaction for each sample. This blank control was assayed containing 3  $\mu$ l beetle  
542 homogenate, 7  $\mu$ l PBS and 50  $\mu$ l H<sub>2</sub>O, and was incubated and measured as the samples  
543 above. The enzyme activity is expressed as increase in absorbance at 420 nm per minute in  
544 the focal sample relative to its blank control ( $\Delta A_{420}/\text{min}$ ).

545

#### 546 ***Sex-specific ontogenetic regulation of phenoloxidase activity***

547 The eggs laid by the females in the mating status experiment (below) were followed through  
548 ontogeny. We sampled a total of 20 final instar larvae, 20 pupae and 14 adults. Larvae of *C.*  
549 *maculatus* could not be sexed. Pupae were sexed by abdominal morphology, for a total of 10  
550 male and 10 female pupae. Virgin adults were collected as virgins within 0-36 hours post  
551 emergence. All individuals were weighed and measured for PO activity. We analysed  
552 differences between developmental stages by adding mass of the tissue analysed as a  
553 covariate in an ANCOVA. As we could not determine the sex of larvae, we performed one  
554 model that averaged effects across the sexes and one model where we excluded larvae and  
555 could retain sex. Both models showed significant differences between life stages.



556

557 ***Female phenoloxidase activity in response to mating.***

558 We used males and females from the Lome base population, reared at standard conditions.

559 All adults were virgin and between 24-48 hours old at the start of the experiment. On day

560 one, 120 females were individually placed in small 30mm diameter petri dishes together

561 with two males, in three separate bouts (40 females at a time). Matings were observed and

562 mated females were immediately removed and placed into a 90mm diameter petri dish

563 containing black eyed beans allowing females to oviposit. In total, 114 of the 120 females

564 mated successfully over an observation period of 20 minutes per bout. A random set of 35 of

565 these females were assigned to treatment 100 (mating on day one and then reproduction in

566 isolation until being measured for PO activity on day three). The rest of the females were

567 given the opportunity to mate on day two and day three, but all females did not mate on all

568 days. This resulted in four treatment groups; 100, (mated on day 1 only), 110 (mated on day

569 1 & 2), 101 (mated on day 1 & 3) and 111 (mated on all days). Approximately two hours after

570 the final mating on day three, all females were weighed and then measured for PO activity

571 as described above. Measuring PO activity is time-consuming, and since preliminary analyses

572 of the first batch of females suggested sufficient power to detect effects of mating status

573 (see Figure 2), all females were not measured. The following sample sizes were attained for

574 each treatment; 100: 15, 110: 7, 101: 13, and 111: 23 females. The treatment groups

575 described above from the first experiment represent non-random samples of females, as not

576 all females can be made to remate on a given day. We therefore conducted a second

577 experiment with random samples of 100 (n = 15) and 001 (n = 15) females to confirm the

578 main result from the first experiment. We counted the number of adult offspring produced

579 by each female over the 48h of egg laying in the first experiment. We analysed the effect of

580 mating status and number of offspring produced, including their interaction, on female PO  
581 activity in an ANCOVA. Female body mass at the time of homogenization was included as a  
582 covariate.

583

584 To determine whether female PO is allocated to eggs, 10 matured eggs per female were  
585 dissected out from 25 virgin females for a total of five samples containing 50 eggs each  
586 (corresponding to approximately 50% of the lifetime production of eggs of a single female).  
587 Samples were weighed and then subjected to the same crushing and centrifuging protocol as  
588 the mated females before being frozen at -80 °C and later measured for PO activity.

589

#### 590 ***Experimental evolution of phenoloxidase activity under alternative mating regimes***

591 The experiment was performed following 27 generations of experimental evolution and one  
592 subsequent generation of common garden (polygamy) selection through standard culturing  
593 to remove any potential influence of parental environmental effects. PO activity was  
594 measured in the whole body of single male and female beetles from two replicate lines from  
595 each mating regime (6 lines in total). To manipulate the reproductive status of the beetles,  
596 newly emerged virgin adults (0-48h old) were either placed together in 90mm diameter  
597 petri-dishes in groups of five males and five females that were allowed to reproduce  
598 (“Reproducing” treatment), or in petri dishes with 5 males and 5 females but individually  
599 isolated in aerated Eppendorf tubes (“Virgin” treatment). All petri dishes contained black  
600 eyed beans, so that all beetles experienced the olfactory stimuli of the host beans, but only  
601 reproducing females could oviposit on the beans. After 46h, individuals were weighed  
602 before being put through the protocol to measure PO activity (see above). Beans from the  
603 mating treatment were stored until adult offspring emerged. Offspring were frozen and

604 20°C and later counted to estimate allocation to reproduction in all regimes. We set up the  
605 experiment in two separate batches one week apart in time, with each batch containing one  
606 replicate line of each evolution regime. We analysed differences among evolution regimes  
607 and mating treatments in Bayesian mixed effect models implementing Markov chain Monte  
608 Carlo simulations using the MCMCglmm package (90) in R (91). We ran separate models for  
609 males and females as PO activity was virtually undetectable in males. Evolution regime and  
610 mating treatment, including their interaction, were added as fixed effects and body mass  
611 was added as a covariate to control for the amount of tissue analysed as we used whole-  
612 body samples. We first tested for presence of a higher order interaction between mating  
613 status and evolution regime, which was non-significant and removed. We then evaluated  
614 significance of main effects by comparing the posterior distributions of marginal means for  
615 two groups in a given comparison (e.g. comparing mean PO activity of monogamous and  
616 polygamous females, averaged over the two mating statuses). In follow-up analyses we also  
617 assessed interactions between female body mass and mating status and evolution regime  
618 (to test for condition-dependence of PO activity; see Results). We blocked out effects of  
619 batch by adding it as a fixed effect. Similarly, we also blocked out the potential effect of  
620 freezing some individuals before homogenizing samples, something that had to be done for  
621 logistic reasons. Replicate line crossed with mating treatment, and adult mass when  
622 appropriate, were always included as random effects when estimating effects of evolution  
623 regime on PO activity. We used weak and unbiased priors for the random effects and ran  
624 models for 3,000,000 iterations, preceded by 100,000 burn-in iterations that were discarded,  
625 and stored every 3,000th iteration (thinning), resulting in 1,000 uncorrelated posterior  
626 estimates of the fixed effects upon which we calculated Bayesian P-values and 95% credible

627 intervals. Prior specification and MCMC settings were the same for all models (exemplified in  
628 Supplementary Table 3c).

629

### 630 ***Evolution of the response to bacterial infection***

631 At generation 50, we collected beetles from each of the three replicate populations of the  
632 Monogamy and Polygamy regime and then maintained them under common garden  
633 conditions (natural polygamy) for one generation to minimize environmental parental  
634 effects. To measure evolved vulnerability to a bacterial pathogen, we first isolated 2-day-old  
635 experimental virgin females from each of the lines and paired them individually with a single  
636 male from their own line for 5 hours. Simultaneously, we also collected another subset of  
637 females that were held as virgin throughout the experiment. On day three post eclosion, we  
638 infected females with a strain (DSM 2046) of the entomopathogenic gram-positive bacteria  
639 *Bacillus thuringiensis*, described in (130). Beetles were first anesthetized with carbon-dioxide  
640 and then pricked at the lateral side of the lower abdomen, using a 0.1mm minuten pin (Fine  
641 Science Tools) dipped in overnight bacterial suspension of 1 OD or 2 OD (subcultured from  
642 an overnight culture of the bacteria). We performed sham infection with a pin dipped in  
643 sterile PBS solution. Following the start of the infection (or sham infection), we isolated  
644 females individually in 24 well-plates. We monitored individual survival at every 12 hours  
645 until 48 hours post infection and daily around 6pm for the next 8 days. Females still alive 10  
646 days post infection (less than 30%) were right-censored in the subsequent survival-analysis.  
647 In a separate experiment, we also measured survival of infected 3-day old virgin males as  
648 described above.

649 At generation 54, we again collected mated females from two randomly selected replicate  
650 populations each of Polygamy and Monogamy and maintained them under common garden

651 conditions. In the subsequent generation (Gen 55) we collected virgin females from each  
652 regime. We first mated two-day old females with a male from their own population. We  
653 then infected the females with a 0.5OD ( $52.5 \pm 19.3$  cells/beetle) or 1.0OD ( $237.5 \pm 124.7$   
654 cells/beetle) solution of the gram-negative bacteria *Pseudomonas entomophila* using the  
655 same protocol as described above for *B. thuringiensis* (note that we could not calculate exact  
656 cell counts for *B. thuringiensis* as the strain used lacked an antibiotic marker). Following the  
657 start of infection, we housed females individually in the 24 well plates. Survival was first  
658 observed after 12 hours and a subset of beetles were taken out for bacterial load assay  
659 described below. We measured survival up to 120 hours after the start of infection.

660 The *P. entomophila* strain used is resistant to the antibiotic ampicillin. This allowed us to  
661 screen the females collected 12h post infection exclusively for *P. entomophila* by plating  
662 their whole-body extract homogenized in sterile PBS buffer on LB agar plates with ampicillin  
663 (0.1mg/ml), and subsequently counting bacterial cultures on the plates to estimate bacterial  
664 load. We first collected 3 surviving females 12hours after start of infection and transferred  
665 them to a micro-centrifuge tube. We then washed the three beetles together with 70%  
666 ethanol twice. Following the ethanol wash we again washed them with sterile water once.  
667 Subsequently, we added 90  $\mu$ l of PBS and crushed the beetles together using a sterile micro-  
668 pestle. From this master-stock solution we made dilutions up to  $10^{-5}$  in 96-welled plates. We  
669 spotted 3ul of each dilution on Luria agar plates with ampicillin. We kept the plates over  
670 night at 27°C and counted distinguishable *Pseudomonas entomophila* colonies. From the  
671 number of colonies, we calculated the bacterial load per female beetle and used that for  
672 further analyses. In total we calculated load for 8 samples per line and bacterial  
673 concentration. One sample was lost, resulting in a total of 63 samples (each based on 3  
674 females). Analyses described in the Results and model specifications in Supplementary 4.

675

676 ***Correlated evolution between PO activity and male genital morphology***

677 We measured the PO activity of 5 virgin males and 5 virgin females of each of the 12 species  
678 (see Figure 5) using whole-body samples. All individuals were less than 48h old post adult  
679 emergence. As the species differ widely in body size, we modified the amount of PBS buffer  
680 added at homogenization to retain more equal concentration of tissue for all species in the  
681 original samples to be analysed for PO activity.

682

683 We used a modified version of the protocol of (23) to assess variation in the injuriousness of  
684 male genitalia. We first dissected out the male genitalium from 2 individuals per species.  
685 Each genitalium was photographed twice from complimentary angles to describe the 3D  
686 structure of the aedeagus (the intromittent apical part of male genitalia). This resulted in 48  
687 photos of the 24 male samples. The two complimentary photos of each genitalium were  
688 placed together on a sheet and given a random ID to hide the species identity for raters. We  
689 asked 10 colleagues (evolutionary ecologists at our institution) to individually rate the 24  
690 male genitalia on a scale from 0-10 in terms of the harm they predicted that the genitalia  
691 would cause inside the female reproductive tract during mating. Two of the authors of this  
692 study, with ample experience of sexual conflict theory and seed beetle biology (GA and JLR)  
693 also rated the genitalia (without knowledge of the recorded PO activity in the species, except  
694 for *C. maculatus*). The scores of naïve and experienced raters were highly aligned (see:  
695 Results), suggesting that the rating of male harmfulness was unbiased in terms of prior  
696 knowledge of the mating system. We extracted a mean score for predicted harmfulness for  
697 each of the 24 males based on scores from all 12 raters.

698

699 We analysed the covariance between harmfulness of the male genitalia and male and  
700 female PO activity based on species means across the phylogeny using phylogenetic least  
701 squares (PGLS) regression with Ohrstein-Uhlenbeck correction implemented in the ape  
702 package(96) for R (model specification and output in Supplementary Table 4). All variables  
703 were variance standardized in the analyses. Given the uncertainty of exact branch lengths,  
704 we set all branches to unit length. PO measurements were divided by the concentration of  
705 tissue in each sample prior to analysis.

706

### 707 ***Declarations***

### 708 ***Author Contributions***

709 IS performed all PO activity assays. EP performed experiments on mating status and  
710 ontogeny. JLR and EP collected data for species comparisons. JB and IMA maintained the  
711 selection lines. QC performed the experiments on PO activity in the lines. BB, DBa and IK  
712 planned and performed measures of responses to bacterial infection in the evolution lines.  
713 EI and AS performed the bioinformatic analyses. DBe analyzed all other data together with  
714 JB. QC, JB, EI and DBe produced the figures. DBe planned and conceived the study with  
715 considerable input from IS, GA and IK. DB wrote the first draft of the manuscript with input  
716 from all authors.

### 717 ***Competing Interests Statement***

718 The authors declare no competing interests

### 719 ***Ethics Statement***

720 This research was conducted according to national legislation. No permits are needed for  
721 research on invertebrates.

### 722 ***Data accessibility:***

723 All data will be uploaded to the Dryad data repository upon final acceptance.

724 ***Consent to publish***

725 All authors and institutions have approved the submission

726 ***Funding***

727 DBe and JB were funded by grants from the Swedish Research council (VR) (grant no. 2015-  
728 05223 to DBe). GA, JLR and IMA were funded by grants to GA from VR (2019-03611) the  
729 European Research Council (GENCON AdG-294333). EI was funded by a grant from VR (2019-  
730 05038). IK, BB and DBa were funded by Ashoka University and Science and Engineering  
731 Research Board, India (ECR/2017/003370 to IK).

732 **References**

- 733 1. Gilks WP, Abbott JK, Morrow EH. Sex differences in disease genetics: evidence, evolution, and  
734 detection. *Trends Genet.* 2014 Oct 1;30(10):453–63.
- 735 2. Kelly CD, Stoehr AM, Nunn C, Smyth KN, Prokop ZM. Sexual dimorphism in immunity across  
736 animals: a meta-analysis. *Ecol Lett.* 2018;21(12):1885–94.
- 737 3. Nunn CL, Lindenfors P, Pursall ER, Rolff J. On sexual dimorphism in immune function. *Philos*  
738 *Trans R Soc B Biol Sci.* 2009 Jan 12;364(1513):61–9.
- 739 4. Oliva M, Muñoz-Aguirre M, Kim-Hellmuth S, Wucher V, Gewirtz ADH, Cotter DJ, et al. The  
740 impact of sex on gene expression across human tissues. *Science* [Internet]. 2020 Sep 11 [cited  
741 2020 Dec 16];369(6509). Available from:  
742 <https://science.sciencemag.org/content/369/6509/eaba3066>
- 743 5. Lawniczak MKN, Barnes AI, Linklater JR, Boone JM, Wigby S, Chapman T. Mating and immunity  
744 in invertebrates. *Trends Ecol Evol.* 2007 Jan 1;22(1):48–55.
- 745 6. Schärer L, Rowe L, Arnqvist G. Anisogamy, chance and the evolution of sex roles. *Trends Ecol*  
746 *Evol.* 2012 May;27(5):260–4.
- 747 7. Parker GA. Sexual conflict over mating and fertilization: an overview. *Philos Trans R Soc B Biol*  
748 *Sci.* 2006 Feb 28;361(1466):235–59.
- 749 8. Andersson M. *Sexual Selection*. Second Edition edition. Princeton, N.J: Princeton University  
750 Press; 1994. 624 p.
- 751 9. Nystrand M, Dowling DK. Effects of immune challenge on expression of life-history and immune  
752 trait expression in sexually reproducing metazoans—a meta-analysis. *BMC Biol.* 2020 Oct  
753 7;18(1):135.



- 754 10. McKean KA, Nunney L. Bateman's Principle and Immunity: Phenotypically Plastic Reproductive  
755 Strategies Predict Changes in Immunological Sex Differences. *Evolution*. 2005;59(7):1510-1517.
- 756 11. Metcalf CJE, Roth O, Graham AL. Why leveraging sex differences in immune trade-offs may  
757 illuminate the evolution of senescence. *Funct Ecol*. 2020;34(1):129-40.
- 758 12. Zuk M, Stoehr AM. Immune Defense and Host Life History. *Am Nat*. 2002 Oct 1;160(S4):S9-22.
- 759 13. Scharf I, Peter F, Martin OY. Reproductive Trade-Offs and Direct Costs for Males in Arthropods.  
760 *Evol Biol*. 2013 Jun 1;40(2):169-84.
- 761 14. Rankin DJ, Dieckmann U, Kokko H. Sexual Conflict and the Tragedy of the Commons. *Am Nat*.  
762 2011 Jun;177(6):780-91.
- 763 15. Lively CM. The ecology of virulence. *Ecol Lett*. 2006;9(10):1089-95.
- 764 16. Ashby B, Boots M. Coevolution of parasite virulence and host mating strategies. *Proc Natl Acad  
765 Sci*. 2015 Oct 27;112(43):13290-5.
- 766 17. Ashby B. Antagonistic coevolution between hosts and sexually transmitted infections.  
767 *Evolution*. 2020;74(1):43-56.
- 768 18. Duneau D, Luijckx P, Ruder LF, Ebert D. Sex-specific effects of a parasite evolving in a female-  
769 biased host population. *BMC Biol*. 2012 Dec 18;10(1):104.
- 770 19. Gipson SAY, Hall MD. The evolution of sexual dimorphism and its potential impact on host-  
771 pathogen coevolution. *Evolution*. 2016 May 1;70(5):959-68.
- 772 20. Zajitschek SR, Zajitschek F, Bonduriansky R, Brooks RC, Cornwell W, Falster DS, et al. Sexual  
773 dimorphism in trait variability and its eco-evolutionary and statistical implications. Rutz C, Gloag  
774 R, Gloag R, editors. *eLife*. 2020 Nov 17;9:e63170.
- 775 21. Knell RJ, Webberley KM. Sexually transmitted diseases of insects: distribution, evolution,  
776 ecology and host behaviour. *Biol Rev*. 2004 Aug;79(3):557-81.
- 777 22. Schwenke RA, Lazzaro BP, Wolfner MF. Reproduction-Immunity Trade-Offs in Insects. *Annu Rev  
778 Entomol*. 2016;61(1):239-56.
- 779 23. Oku K, Price TAR, Wedell N. Does mating negatively affect female immune defences in insects?  
780 *Anim Biol*. 2019 Jan 1;69(1):117-36.
- 781 24. Wardlaw AM, Agrawal AF. Sexual Conflict and Sexually Transmitted Infections (STIs):  
782 Coevolution of Sexually Antagonistic Host Traits with an STI. *Am Nat*. 2019 Jan 1;193(1):E1-14.
- 783 25. Ashby B, Gupta S. Sexually transmitted infections in polygamous mating systems. *Philos Trans R  
784 Soc B Biol Sci*. 2013 Mar 5;368(1613):20120048.
- 785 26. Rowe M, Veerus L, Trosvik P, Buckling A, Pizzari T. The Reproductive Microbiome: An Emerging  
786 Driver of Sexual Selection, Sexual Conflict, Mating Systems, and Reproductive Isolation. *Trends  
787 Ecol Evol*. 2020 Mar 1;35(3):220-34.

- 788 27. Barribeau SM, Otti O. Sexual Reproduction and Immunity. In: eLS [Internet]. American Cancer  
789 Society; 2020 [cited 2021 Feb 22]. p. 1–10. Available from:  
790 <https://onlinelibrary.wiley.com/doi/abs/10.1002/9780470015902.a0028146>
- 791 28. Otti O. Genitalia-associated microbes in insects. *Insect Sci.* 2015;22(3):325–39.
- 792 29. Duneau D, Ebert D. Host Sexual Dimorphism and Parasite Adaptation. *PLOS Biol.* 2012  
793 Feb;10(2):e1001271.
- 794 30. Flatt T, editor. Mechanisms of life history evolution: the genetics and physiology of life history  
795 traits and trade-offs. reprinted with corr. Oxford: Oxford Univ. Press; 2012. 478 p.
- 796 31. Naim N, Amrit FRG, McClendon TB, Yanowitz JL, Ghazi A. The molecular tug of war between  
797 immunity and fertility: Emergence of conserved signaling pathways and regulatory  
798 mechanisms. *BioEssays.* 2020;42(12):2000103.
- 799 32. Fedorka KM, Zuk M, Mousseau TA. Immune Suppression and the Cost of Reproduction in the  
800 Ground Cricket, *Allonemobius Socius*. *Evolution.* 2004;58(11):2478–85.
- 801 33. Rolff J, Siva-Jothy MT. Copulation corrupts immunity: A mechanism for a cost of mating in  
802 insects. *Proc Natl Acad Sci.* 2002 Jul 23;99(15):9916–8.
- 803 34. McKean KA, Yourth CP, Lazzaro BP, Clark AG. The evolutionary costs of immunological  
804 maintenance and deployment. *BMC Evol Biol.* 2008 Mar 3;8(1):76.
- 805 35. Rolff J. Bateman's principle and immunity. *Proc R Soc Lond B Biol Sci.* 2002 Apr  
806 22;269(1493):867–72.
- 807 36. Stoehr AM, Kokko H. Sexual dimorphism in immunocompetence: what does life-history theory  
808 predict? *Behav Ecol.* 2006 Sep 1;17(5):751–6.
- 809 37. Syed ZA, Gupta V, Arun MG, Dhiman A, Nandy B, Prasad NG. Absence of reproduction-immunity  
810 trade-off in male *Drosophila melanogaster* evolving under differential sexual selection. *BMC*  
811 *Evol Biol.* 2020 Jan 28;20(1):13.
- 812 38. McNamara KB, Wedell N, Simmons LW. Experimental evolution reveals trade-offs between  
813 mating and immunity. *Biol Lett.* 2013 Aug 23;9(4):20130262.
- 814 39. Rostant WG, Mason JS, Coriolis J-C de, Chapman T. Resource-dependent evolution of female  
815 resistance responses to sexual conflict. *Evol Lett.* 2020;4(1):54–64.
- 816 40. Clutton-Brock TH, Parker GA. Potential Reproductive Rates and the Operation of Sexual  
817 Selection. *Q Rev Biol.* 1992 Dec 1;67(4):437–56.
- 818 41. Roved J, Westerdahl H, Hasselquist D. Sex differences in immune responses: Hormonal effects,  
819 antagonistic selection, and evolutionary consequences. *Horm Behav.* 2017 Feb 1;88:95–105.
- 820 42. Hamilton WD, Zuk M. Heritable true fitness and bright birds: a role for parasites? *Science.* 1982  
821 Oct 22;218(4570):384–7.
- 822 43. Arnqvist G, Rowe L. Antagonistic coevolution between the sexes in a group of insects. *Nature.*  
823 2002 Feb;415(6873):787–9.

- 824 44. Sirot LK, Wong A, Chapman T, Wolfner MF. Sexual Conflict and Seminal Fluid Proteins: A  
825 Dynamic Landscape of Sexual Interactions. *Cold Spring Harb Perspect Biol.* 2015 Jan  
826 2;7(2):a017533.
- 827 45. Hollis B, Koppik M, Wensing KU, Ruhmann H, Genzoni E, Erkosar B, et al. Sexual conflict drives  
828 male manipulation of female postmating responses in *Drosophila melanogaster*. *Proc Natl Acad*  
829 *Sci.* 2019 Apr 23;116(17):8437–44.
- 830 46. Arnqvist G, Rowe L. *Sexual Conflict*. Princeton University Press; 2005. 347 p.
- 831 47. Rönn J, Katvala M, Arnqvist G. Coevolution between harmful male genitalia and female  
832 resistance in seed beetles. *Proc Natl Acad Sci.* 2007 Jun 26;104(26):10921–5.
- 833 48. Dougherty LR, van Lieshout E, McNamara KB, Moschilla JA, Arnqvist G, Simmons LW. Sexual  
834 conflict and correlated evolution between male persistence and female resistance traits in the  
835 seed beetle *Callosobruchus maculatus*. *Proc R Soc B Biol Sci.* 2017 May 31;284(1855):20170132.
- 836 49. Belmonte RL, Corbally M-K, Duneau DF, Regan JC. Sexual Dimorphisms in Innate Immunity and  
837 Responses to Infection in *Drosophila melanogaster*. *Front Immunol [Internet].* 2020 [cited 2020  
838 Dec 8];10. Available from:  
839 <https://www.frontiersin.org/articles/10.3389/fimmu.2019.03075/full?report=reader>
- 840 50. Hangartner S, Michalczyk Ł, Gage MJG, Martin OY. Experimental removal of sexual selection  
841 leads to decreased investment in an immune component in female *Tribolium castaneum*. *Infect*  
842 *Genet Evol.* 2015 Jul 1;33:212–8.
- 843 51. Pitnick S, Wolfner MF, Suarez SS. 7 - Ejaculate–female and sperm–female interactions. In:  
844 Birkhead TR, Hosken DJ, Pitnick S, editors. *Sperm Biology [Internet].* London: Academic Press;  
845 2009 [cited 2020 Jan 8]. p. 247–304. Available from:  
846 <http://www.sciencedirect.com/science/article/pii/B9780123725684000070>
- 847 52. Short SM, Wolfner MF, Lazzaro BP. Female *Drosophila melanogaster* suffer reduced defense  
848 against infection due to seminal fluid components. *J Insect Physiol.* 2012 Sep 1;58(9):1192–201.
- 849 53. Hosken DJ. Sex and death: microevolutionary trade-offs between reproductive and immune  
850 investment in dung flies. *Curr Biol.* 2001 May;11(10):R379–80.
- 851 54. Cerenius L, Lee BL, Söderhäll K. The proPO-system: pros and cons for its role in invertebrate  
852 immunity. *Trends Immunol.* 2008 Jun 1;29(6):263–71.
- 853 55. González-Santoyo I, Córdoba-Aguilar A. Phenoloxidase: a key component of the insect immune  
854 system. *Entomol Exp Appl.* 2012;142(1):1–16.
- 855 56. Savalli UM, Fox CW. The effect of male size, age, and mating behavior on sexual selection in the  
856 seed beetle *Callosobruchus maculatus*. *Ethol Ecol Evol.* 1999 Jan 1;11(1):49–60.
- 857 57. Gay L, Hosken DJ, Vasudev R, Tregenza T, Eady PE. Sperm competition and maternal effects  
858 differentially influence testis and sperm size in *Callosobruchus maculatus*. *J Evol Biol.* 2009 May  
859 1;22(5):1143–50.
- 860 58. Eady PE. Why do male *Callosobruchus maculatus* beetles inseminate so many sperm? *Behav*  
861 *Ecol Sociobiol.* 1995 Jan 1;36(1):25–32.

- 862 59. Hotzy C, Arnqvist G. Sperm Competition Favors Harmful Males in Seed Beetles. *Curr Biol*. 2009  
863 Mar 10;19(5):404–7.
- 864 60. Crudgington HS, Siva-Jothy MT. Genital damage, kicking and early death. *Nature*. 2000  
865 Oct;407(6806):855–6.
- 866 61. Arnqvist G, Nilsson T, Katvala M. Mating rate and fitness in female bean weevils. *Behav Ecol*.  
867 2005 Jan 1;16(1):123–7.
- 868 62. Hotzy C, Polak M, Rönn JL, Arnqvist G. Phenotypic Engineering Unveils the Function of Genital  
869 Morphology. *Curr Biol*. 2012 Dec 4;22(23):2258–61.
- 870 63. Martinossi-Allibert I, Thilliez E, Arnqvist G, Berger D. Sexual selection, environmental robustness  
871 and evolutionary demography of maladapted populations: a test using experimental evolution  
872 in seed beetles. *Evol Appl* [Internet]. [cited 2019 Jan 8];0(ja). Available from:  
873 <https://onlinelibrary.wiley.com/doi/abs/10.1111/eva.12758>
- 874 64. Lange R, Reinhardt K, Michiels NK, Anthes N. Functions, diversity, and evolution of traumatic  
875 mating. *Biol Rev*. 2013;88(3):585–601.
- 876 65. Stutt AD, Siva-Jothy MT. Traumatic insemination and sexual conflict in the bed bug *Cimex*  
877 *lectularius*. *Proc Natl Acad Sci*. 2001 May 8;98(10):5683–7.
- 878 66. Reinhardt K, Naylor RA, Siva-Jothy MT. Potential sexual transmission of environmental microbes  
879 in a traumatically inseminating insect. *Ecol Entomol*. 2005;30(5):607–11.
- 880 67. Cerenius L, Söderhäll K. The prophenoloxidase-activating system in invertebrates. *Immunol Rev*.  
881 2004;198(1):116–26.
- 882 68. Lu A, Zhang Q, Zhang J, Yang B, Wu K, Xie W, et al. Insect prophenoloxidase: the view beyond  
883 immunity. *Front Physiol* [Internet]. 2014 [cited 2020 Jul 6];5. Available from:  
884 <https://www.frontiersin.org/articles/10.3389/fphys.2014.00252/full>
- 885 69. Theopold U, Schmidt O, Söderhäll K, Dushay MS. Coagulation in arthropods: defence, wound  
886 closure and healing. *Trends Immunol*. 2004 Jun 1;25(6):289–94.
- 887 70. Park J-W, Kim C-H, Rui J, Keun-HwaPark, Ryu K-H, Chai J-H, et al. Beetle Immunity. In: Söderhäll  
888 K, editor. *Invertebrate Immunity* [Internet]. Boston, MA: Springer US; 2010 [cited 2020 Jul 6]. p.  
889 163–80. (*Advances in Experimental Medicine and Biology*). Available from:  
890 [https://doi.org/10.1007/978-1-4419-8059-5\\_9](https://doi.org/10.1007/978-1-4419-8059-5_9)
- 891 71. Roh K-B, Kim C-H, Lee H, Kwon H-M, Park J-W, Ryu J-H, et al. Proteolytic cascade for the  
892 activation of the insect toll pathway induced by the fungal cell wall component. *J Biol Chem*.  
893 2009 Jul 17;284(29):19474–81.
- 894 72. Kan H, Kim C-H, Kwon H-M, Park J-W, Roh K-B, Lee H, et al. Molecular control of phenoloxidase-  
895 induced melanin synthesis in an insect. *J Biol Chem*. 2008 Sep 12;283(37):25316–23.
- 896 73. Nappi AJ, Christensen BM. Melanogenesis and associated cytotoxic reactions: Applications to  
897 insect innate immunity. *Insect Biochem Mol Biol*. 2005 May 1;35(5):443–59.
- 898 74. Wang Y, Yang F, Cao X, Huang R, Paskewitz S, Hartson SD, et al. Inhibition of immune pathway-  
899 initiating hemolymph protease-14 by *Manduca sexta* serpin-12, a conserved mechanism for the

- 900 regulation of melanization and Toll activation in insects. *Insect Biochem Mol Biol.* 2020 Jan  
901 1;116:103261.
- 902 75. Zhao M, Söderhäll I, Park JW, Ma YG, Osaki T, Ha N-C, et al. A Novel 43-kDa Protein as a  
903 Negative Regulatory Component of Phenoloxidase-induced Melanin Synthesis. *J Biol Chem.*  
904 2005 Jan 7;280(26):24744–51.
- 905 76. Khan I, Agashe D, Rolff J. Early-life inflammation, immune response and ageing. *Proc R Soc B*  
906 *Biol Sci.* 2017 Mar 15;284(1850):20170125.
- 907 77. Sadd BM, Siva-Jothy MT. Self-harm caused by an insect's innate immunity. *Proc R Soc B Biol Sci.*  
908 2006 Oct 7;273(1600):2571–4.
- 909 78. Lemaitre B, Hoffmann J. The Host Defense of *Drosophila melanogaster*. *Annu Rev Immunol.*  
910 2007;25(1):697–743.
- 911 79. Freitak D, Wheat CW, Heckel DG, Vogel H. Immune system responses and fitness costs  
912 associated with consumption of bacteria in larvae of *Trichoplusia ni*. *BMC Biol.* 2007 Dec  
913 21;5(1):56.
- 914 80. Wilfert L, Gadau J, Schmid-Hempel P. The Genetic Architecture of Immune Defense and  
915 Reproduction in Male *Bombus Terrestris* Bumblebees. *Evolution.* 2007;61(4):804–15.
- 916 81. Jiang R, Kim E-H, Gong J-H, Kwon H-M, Kim C-H, Ryu K-H, et al. Three Pairs of Protease-Serpin  
917 Complexes Cooperatively Regulate the Insect Innate Immune Responses. *J Biol Chem.* 2009 Dec  
918 18;284(51):35652–8.
- 919 82. Armitage S a. O, Thompson JJW, Rolff J, Siva-Jothy MT. Examining costs of induced and  
920 constitutive immune investment in *Tenebrio molitor*. *J Evol Biol.* 2003;16(5):1038–44.
- 921 83. Miyashita A, Lee TYM, McMillan LE, Easy R, Adamo SA. Immunity for nothing and the eggs for  
922 free: Apparent lack of both physiological trade-offs and terminal reproductive investment in  
923 female crickets (*Gryllus texensis*). *PLOS ONE.* 2019 May;14(5):e0209957.
- 924 84. Reznick D, Nunney L, Tessier A. Big houses, big cars, superfleas and the costs of reproduction.  
925 *Trends Ecol Evol.* 2000 Oct 1;15(10):421–5.
- 926 85. Jong G de, Noordwijk AJ van. Acquisition and Allocation of Resources: Genetic (CO) Variances,  
927 Selection, and Life Histories. *Am Nat.* 1992;139(4):749–70.
- 928 86. MacPherson A, Yun L, Barrera TS, Agrawal AF, Rundle HD. The effects of male harm vary with  
929 female quality and environmental complexity in *Drosophila melanogaster*. *Biol Lett.* 2018 Aug  
930 1;14(8):20180443.
- 931 87. Zera AJ, Harshman LG. The Physiology of Life History Trade-Offs in Animals. *Annu Rev Ecol Syst.*  
932 2001 Nov;32(1):95–126.
- 933 88. Baur J, Nsanzimana J d'Amour, Berger D. Sexual selection and the evolution of male and female  
934 cognition: A test using experimental evolution in seed beetles\*. *Evolution.* 2019;73(12):2390–  
935 400.
- 936 89. Baur J, Berger D. Experimental evidence for effects of sexual selection on condition-dependent  
937 mutation rates. *Nat Ecol Evol.* 2020 May;4(5):737–44.

- 938 90. Hadfield JD. MCMC methods for multi-response generalized linear mixed models: the  
939 MCMCglmm R package. *J Stat Softw.* 2010;33(2):1–22.
- 940 91. R: The R Project for Statistical Computing [Internet]. [cited 2020 Jan 3]. Available from:  
941 <https://www.r-project.org/>
- 942 92. Rantala MJ, Kortet R, Kotiaho JS, Vainikka A, Suhonen J. Condition dependence of pheromones  
943 and immune function in the grain beetle *Tenebrio molitor*. *Funct Ecol.* 2003;17(4):534–40.
- 944 93. Therneau TM. *coxme: Mixed Effects Cox Models* [Internet]. 2018 [cited 2019 Jun 15]. Available  
945 from: <https://CRAN.R-project.org/package=coxme>
- 946 94. Ayres JS, Schneider DS. Tolerance of Infections. *Annu Rev Immunol.* 2012;30(1):271–94.
- 947 95. Blomberg SP, Garland T, Ives AR. Testing for Phylogenetic Signal in Comparative Data:  
948 Behavioral Traits Are More Labile. *Evolution.* 2003;57(4):717–45.
- 949 96. Paradis E, Schliep K. *ape 5.0: an environment for modern phylogenetics and evolutionary*  
950 *analyses in R. Bioinformatics.* 2019 Feb 1;35(3):526–8.
- 951 97. Tuda M, Rönn JL, Buranapanichpan S, Wasano N, Arnqvist G. Evolutionary diversification of the  
952 bean beetle genus *Callosobruchus* (Coleoptera: Bruchidae): traits associated with stored-  
953 product pest status. *Mol Ecol.* 2006;15(12):3541–51.
- 954 98. Jolivet P, Santiago-Blay J, Schmitt M. *Research on Chrysomelidae, Volume 1.* BRILL; 2008. 430 p.
- 955 99. Hampton KJ, Duffield KR, Hunt J, Sakaluk SK, Sadd BM. Male and female genotype and a  
956 genotype-by-genotype interaction mediate the effects of mating on cellular but not humoral  
957 immunity in female decorated crickets. *Heredity.* 2021 Mar;126(3):477–90.
- 958 100. Fricke C, Ávila-Calero S, Armitage SAO. Genotypes and their interaction effects on reproduction  
959 and mating-induced immune activation in *Drosophila melanogaster*. *J Evol Biol.*  
960 2020;33(7):930–41.
- 961 101. Castella G, Christe P, Chapuisat M. Mating triggers dynamic immune regulations in wood ant  
962 queens. *J Evol Biol.* 2009;22(3):564–70.
- 963 102. Berger D, Martinossi-Allibert I, Grieshop K, Lind MI, Maklakov AA, Arnqvist G. Intralocus Sexual  
964 Conflict and the Tragedy of the Commons in Seed Beetles. *Am Nat.* 2016 Oct;188(4):E98–112.
- 965 103. Yamane T, Goenaga J, Rönn JL, Arnqvist G. Male Seminal Fluid Substances Affect Sperm  
966 Competition Success and Female Reproductive Behavior in a Seed Beetle. *PLOS ONE.* 2015  
967 Apr;10(4):e0123770.
- 968 104. Rönn JL, Hotzy C. Do longer genital spines in male seed beetles function as better anchors  
969 during mating? *Anim Behav.* 2012 Jan 1;83(1):75–9.
- 970 105. Edvardsson M, Tregenza T. Why do male *Callosobruchus maculatus* harm their mates? *Behav*  
971 *Ecol.* 2005 Jul 1;16(4):788–93.
- 972 106. Kim C-H, Kim S-J, Kan H, Kwon H-M, Roh K-B, Jiang R, et al. A Three-step Proteolytic Cascade  
973 Mediates the Activation of the Peptidoglycan-induced Toll Pathway in an Insect. *J Biol Chem.*  
974 2008 Mar 21;283(12):7599–607.

- 975 107. Tanji T, Hu X, Weber ANR, Ip YT. Toll and IMD pathways synergistically activate an innate  
976 immune response in *Drosophila melanogaster*. *Mol Cell Biol*. 2007 Jun;27(12):4578–88.
- 977 108. Park S, Jo YH, Park KB, Ko HJ, Kim CE, Bae YM, et al. TmToll-7 Plays a Crucial Role in Innate  
978 Immune Responses Against Gram-Negative Bacteria by Regulating 5 AMP Genes in *Tenebrio*  
979 *molitor*. *Front Immunol* [Internet]. 2019 [cited 2021 Mar 18];10. Available from:  
980 <https://www.frontiersin.org/articles/10.3389/fimmu.2019.00310/full>
- 981 109. Noonin C, Jiravanichpaisal P, Söderhäll I, Merino S, Tomás JM, Söderhäll K. Melanization and  
982 Pathogenicity in the Insect, *Tenebrio molitor*, and the Crustacean, *Pacifastacus leniusculus*, by  
983 *Aeromonas hydrophila* AH-3. *PLOS ONE*. 2010 Dec;5(12):e15728.
- 984 110. Chae J-H, Kurokawa K, So Y-I, Hwang HO, Kim M-S, Park J-W, et al. Purification and  
985 characterization of tenecin 4, a new anti-Gram-negative bacterial peptide, from the beetle  
986 *Tenebrio molitor*. *Dev Comp Immunol*. 2012 Mar;36(3):540–6.
- 987 111. Duneau DF, Kondolf HC, Im JH, Ortiz GA, Chow C, Fox MA, et al. The Toll pathway underlies host  
988 sexual dimorphism in resistance to both Gram-negative and Gram-positive bacteria in mated  
989 *Drosophila*. *BMC Biol*. 2017 Dec 21;15(1):124.
- 990 112. Innocenti P, Morrow EH. Immunogenic males: a genome-wide analysis of reproduction and the  
991 cost of mating in *Drosophila melanogaster* females. *J Evol Biol*. 2009 May 1;22(5):964–73.
- 992 113. Pauletto M, Cattelan S, Pilastro A, Babbucci M, Bargelloni L, Gasparini C. Molecular insights into  
993 post-mating immune response in a fish with internal fertilization. *J Evol Biol*. 2020;33(6):751–  
994 61.
- 995 114. Barribeau SM, Schmid-Hempel P. Sexual healing: mating induces a protective immune response  
996 in bumblebees. *J Evol Biol*. 2017;30(1):202–9.
- 997 115. Johns S, Henshaw JM, Jennions MD, Head ML. Males can evolve lower resistance to sexually  
998 transmitted infections to infect their mates and thereby increase their own fitness. *Evol Ecol*.  
999 2019 Apr 1;33(2):149–72.
- 1000 116. Morrow EH, Arnqvist G, Pitnick S. Adaptation versus pleiotropy: why do males harm their  
1001 mates? *Behav Ecol*. 2003 Nov 1;14(6):802–6.
- 1002 117. Immonen E, Ritchie MG. The genomic response to courtship song stimulation in female  
1003 *Drosophila melanogaster*. *Proc R Soc B Biol Sci*. 2012 Apr 7;279(1732):1359–65.
- 1004 118. Zhong W, McClure CD, Evans CR, Mlynski DT, Immonen E, Ritchie MG, et al. Immune  
1005 anticipation of mating in *Drosophila*: Turandot M promotes immunity against sexually  
1006 transmitted fungal infections. *Proc Biol Sci*. 2013 Dec 22;280(1773):20132018.
- 1007 119. Siva-Jothy MT, Zhong W, Naylor R, Heaton L, Hentley W, Harney E. Female bed bugs (*Cimex*  
1008 *lectularius* L) anticipate the immunological consequences of traumatic insemination via feeding  
1009 cues. *Proc Natl Acad Sci*. 2019 Jul 16;116(29):14682–7.
- 1010 120. Fox CW. Multiple Mating, Lifetime Fecundity and Female Mortality of the Bruchid Beetle,  
1011 *Callosobruchus maculatus* (Coleoptera: Bruchidae). *Funct Ecol*. 1993;7(2):203–8.

- 1012 121. Fox CW, Stillwell RC, Wallin WG, Curtis CL, Reed DH. Inbreeding-environment interactions for  
1013 fitness: complex relationships between inbreeding depression and temperature stress in a  
1014 seed-feeding beetle. *Evol Ecol*. 2011 Jan;25(1):25–43.
- 1015 122. Berger D, Stångberg J, Grieshop K, Martinossi-Allibert I, Arnqvist G. Temperature effects on life-  
1016 history trade-offs, germline maintenance and mutation rate under simulated climate warming.  
1017 *Proc R Soc B*. 2017 Nov 15;284(1866):20171721.
- 1018 123. Berger D, Grieshop K, Lind MI, Goenaga J, Maklakov AA, Arnqvist G. INTRALOCUS SEXUAL  
1019 CONFLICT AND ENVIRONMENTAL STRESS: SEX, GENES, AND CONFLICT IN STRESSFUL  
1020 ENVIRONMENTS. *Evolution*. 2014 May;n/a-n/a.
- 1021 124. Martinossi-Allibert I, Arnqvist G, Berger D. Sex-specific selection under environmental stress in  
1022 seed beetles. *J Evol Biol*. 2017 Jan;30(1):161–73.
- 1023 125. Grieshop K, Arnqvist G. Sex-specific dominance reversal of genetic variation for fitness. *PLOS*  
1024 *Biol*. 2018 Dec;16(12):e2006810.
- 1025 126. Berger D, You T, Minano MR, Grieshop K, Lind MI, Arnqvist G, et al. Sexually antagonistic  
1026 selection on genetic variation underlying both male and female same-sex sexual behavior. *BMC*  
1027 *Evol Biol* [Internet]. 2016 Dec [cited 2018 Nov 28];16(1). Available from:  
1028 <http://bmcevolbiol.biomedcentral.com/articles/10.1186/s12862-016-0658-4>
- 1029 127. Tuda M, Kagoshima K, Toquenaga Y, Arnqvist G. Global Genetic Differentiation in a  
1030 Cosmopolitan Pest of Stored Beans: Effects of Geography, Host-Plant Usage and Anthropogenic  
1031 Factors. *PLOS ONE*. 2014 Sep;9(9):e106268.
- 1032 128. Immonen E, Sayadi A, Bayram H, Arnqvist G. Mating Changes Sexually Dimorphic Gene  
1033 Expression in the Seed Beetle *Callosobruchus maculatus*. *Genome Biol Evol*. 2017 Mar  
1034 1;9(3):677–99.
- 1035 129. Sayadi A, Immonen E, Bayram H, Arnqvist G. The De Novo Transcriptome and Its Functional  
1036 Annotation in the Seed Beetle *Callosobruchus maculatus*. *PLoS ONE* [Internet]. 2016 Jul 21  
1037 [cited 2020 Mar 20];11(7). Available from:  
1038 <https://www.ncbi.nlm.nih.gov/pmc/articles/PMC4956038/>
- 1039 130. Khan I, Prakash A, Agashe D. Pathogen susceptibility and fitness costs explain variation in  
1040 immune priming across natural populations of flour beetles. *J Anim Ecol*. 2019;88(9):1332–42.
- 1041
- 1042
- 1043



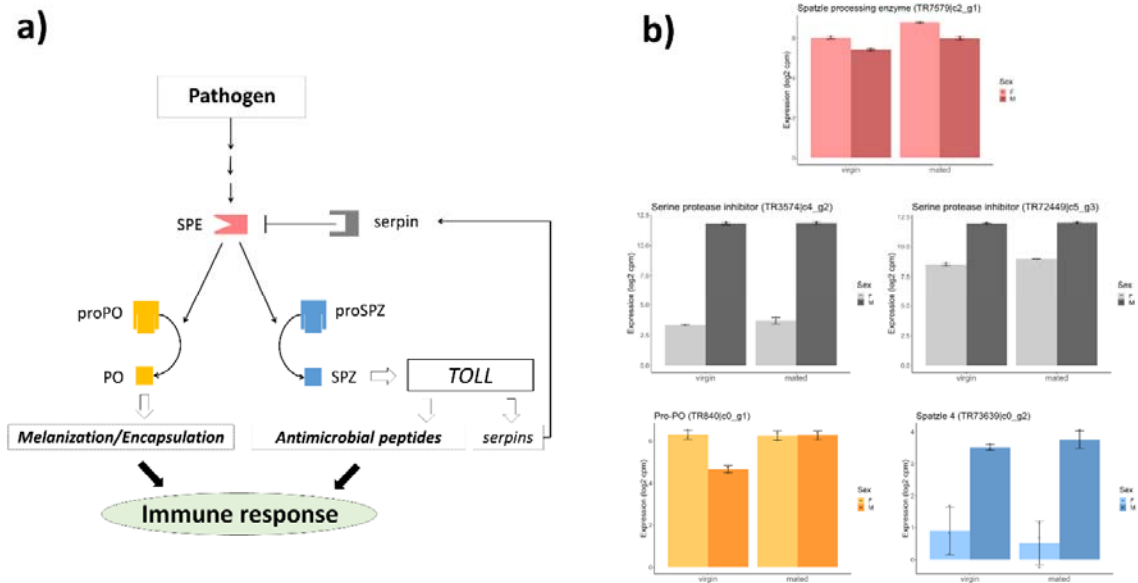

1044

1045

**Figure 1: Sex-biased gene expression in the proPO signalling cascade.**

1046

In **a)** schematic representation of key proteins in the proPO activating cascade, based on previous studies of insects and other invertebrates (reviewed in: (54,55,67,73,78)). In **b)** sex-bias and effects of mating status on gene expression in the abdomen for *C. maculatus* orthologs from published data (128) mapped to the sequences of the functionally annotated proteins. Full results in Supplementary Table 1. Spätzle processing enzyme (SPE: pink) initiates cleavage of proPO (yellow) into active PO, which ultimately leads to wound healing as well as encapsulation and killing of foreign pathogens. However, SPE also regulates the production of Spätzle protein (SPZ) from proSPZ (blue), which ultimately leads to increased production of antimicrobial peptides (AMPs) via the TOLL pathway, which offers inducible immunity against pathogens, thus setting the stage for an allocation trade-off between PO-activity and AMP-production. Overactivation of the proPO cascade has toxic side-effects via the production of secondary metabolites, suggesting that overproduction of SPE may come at a cost to overall health. Here, production of serine protease inhibitors (serpins: grey) in the TOLL-pathway exerts negative feedback and control over the cascade. **b)** *C. maculatus* females show higher expression of SPE (pink) and proPO (yellow) as virgins. Males show higher expression of proSPZ (blue) and serpins (grey). These patterns in gene expression suggest a mechanistic basis for sex-specific immunity trade-offs between different components in the pro-PO activating cascade, where females are predicted to invest more in PO-activity (wound healing and potentially encapsulation of pathogens transferred at mating) in their reproductive tract in response to mating, at the potential cost of reduced inducible immunity via AMP-production and/or toxic side-effects of overactivation of the proPO cascade.

1047

1048

1049

1050

1051

1052

1053

1054

1055

1056

1057

1058

1059

1060

1061

1062

1063

1064

1065

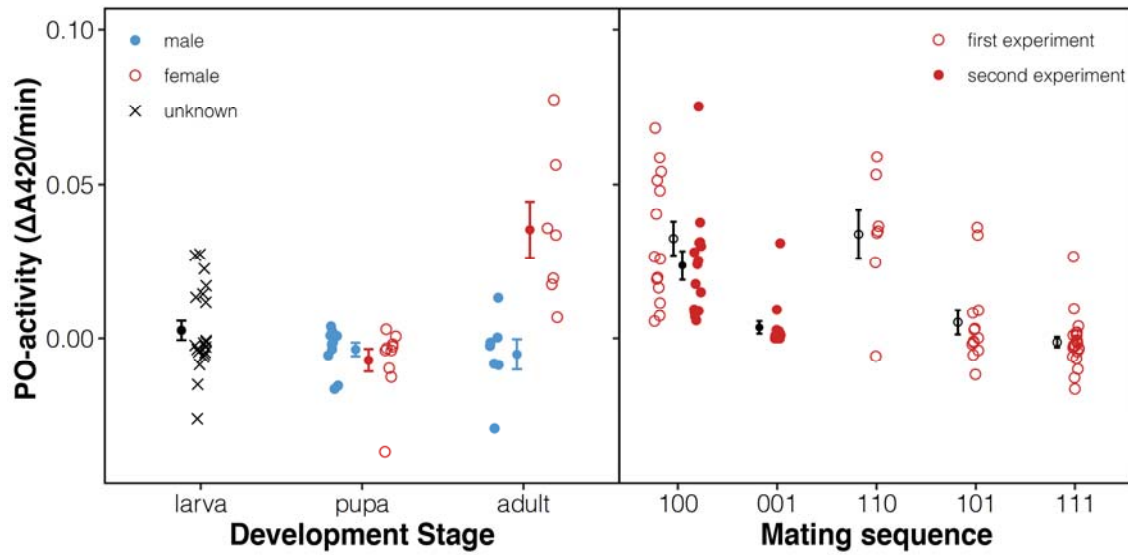

1066

1067

1068 **Figure 2: Sex-specific regulation of phenoloxidase levels.**

1069 **(a)** There were significant differences in PO activity throughout development, with levels near zero  
1070 detected in male (blue) and female (red) pupae and virgin adult males, but detectable levels in  
1071 (unsexed = black) larvae and high levels in virgin adult females. **(b)** PO activity measured on day 3 in  
1072 females mated only on day one (100), day one and two (110), day one and three (101), or on all days  
1073 (111) (open symbols). A second experiment measured PO activity for a random set of females  
1074 assigned to treatments 100 and 001 (mated only on day three) (filled symbols). Female PO activity is  
1075 reduced after mating but is then quickly restored (compare also to virgin females (i.e. 000 treatment))  
1076 in **(a)**. Shown are means  $\pm$  1 SE and individual observations. PO-activity was corrected for body mass  
1077 by including mass as a covariate in all analyses but is here displayed as raw data since the mean  
1078 amount of tissue in samples was similar for all groups.  
1079

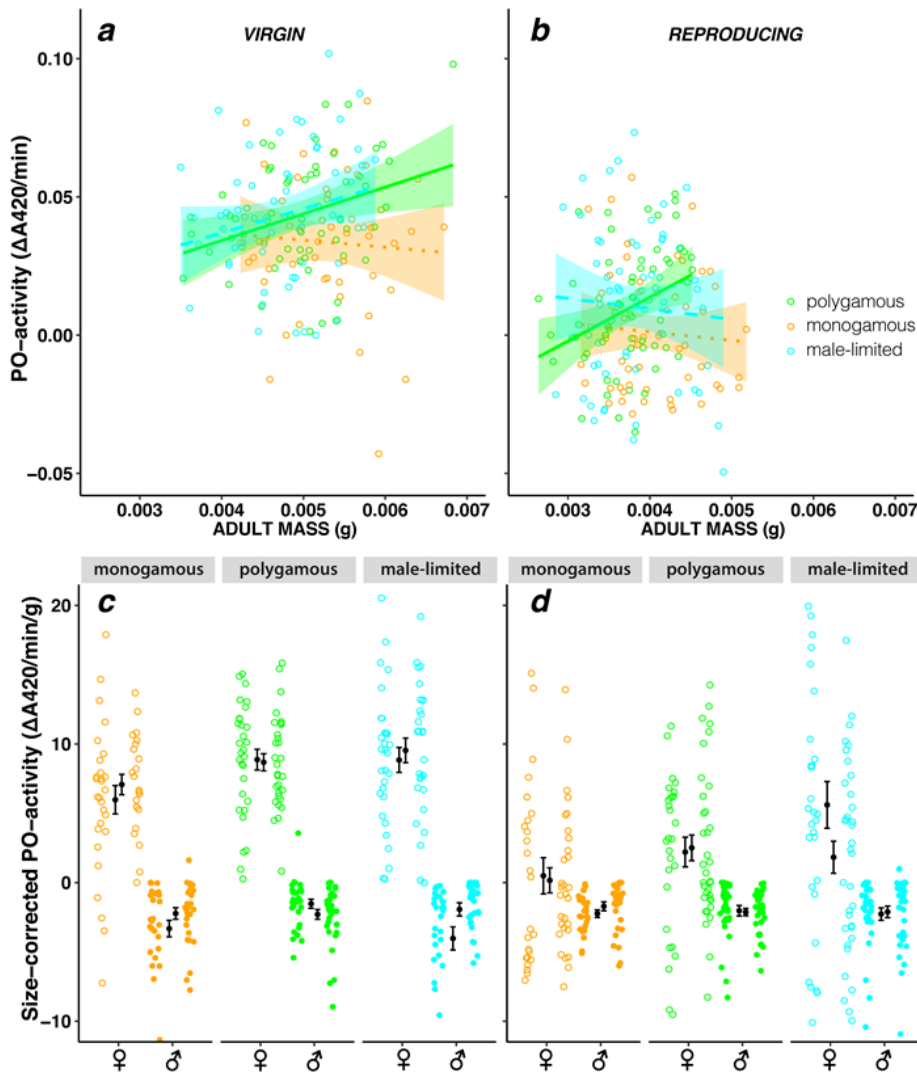

1080

1081 **Figure 3: Microevolutionary change in PO activity during experimental evolution.**

1082 PO activity measured from whole-body samples of virgin (a) and mated (b) females from polygamous  
1083 (green) monogamous (orange) and male-limited (blue) evolution lines. The mating treatment  
1084 significantly reduced female PO activity and male-limited and polygamous females had higher PO  
1085 activity than monogamous females. Polygamous and monogamous females also differed significantly  
1086 in the relationship between body mass and PO activity, suggesting that different allocation strategies  
1087 evolved under the alternative mating regimes. Given are regression slopes, shaded 95% confidence  
1088 limits, and individual observations. Males from the regimes did not express detectable levels of PO  
1089 activity and showed no significant differences among regimes and mating treatments  
1090 (Supplementary Table 1c). In the lower panels, sex differences in size-corrected PO activity is  
1091 illustrated in each regime for (c) virgin and (d) reproducing beetles (means  $\pm$  1SE and individual  
1092 measures).

1093

1094

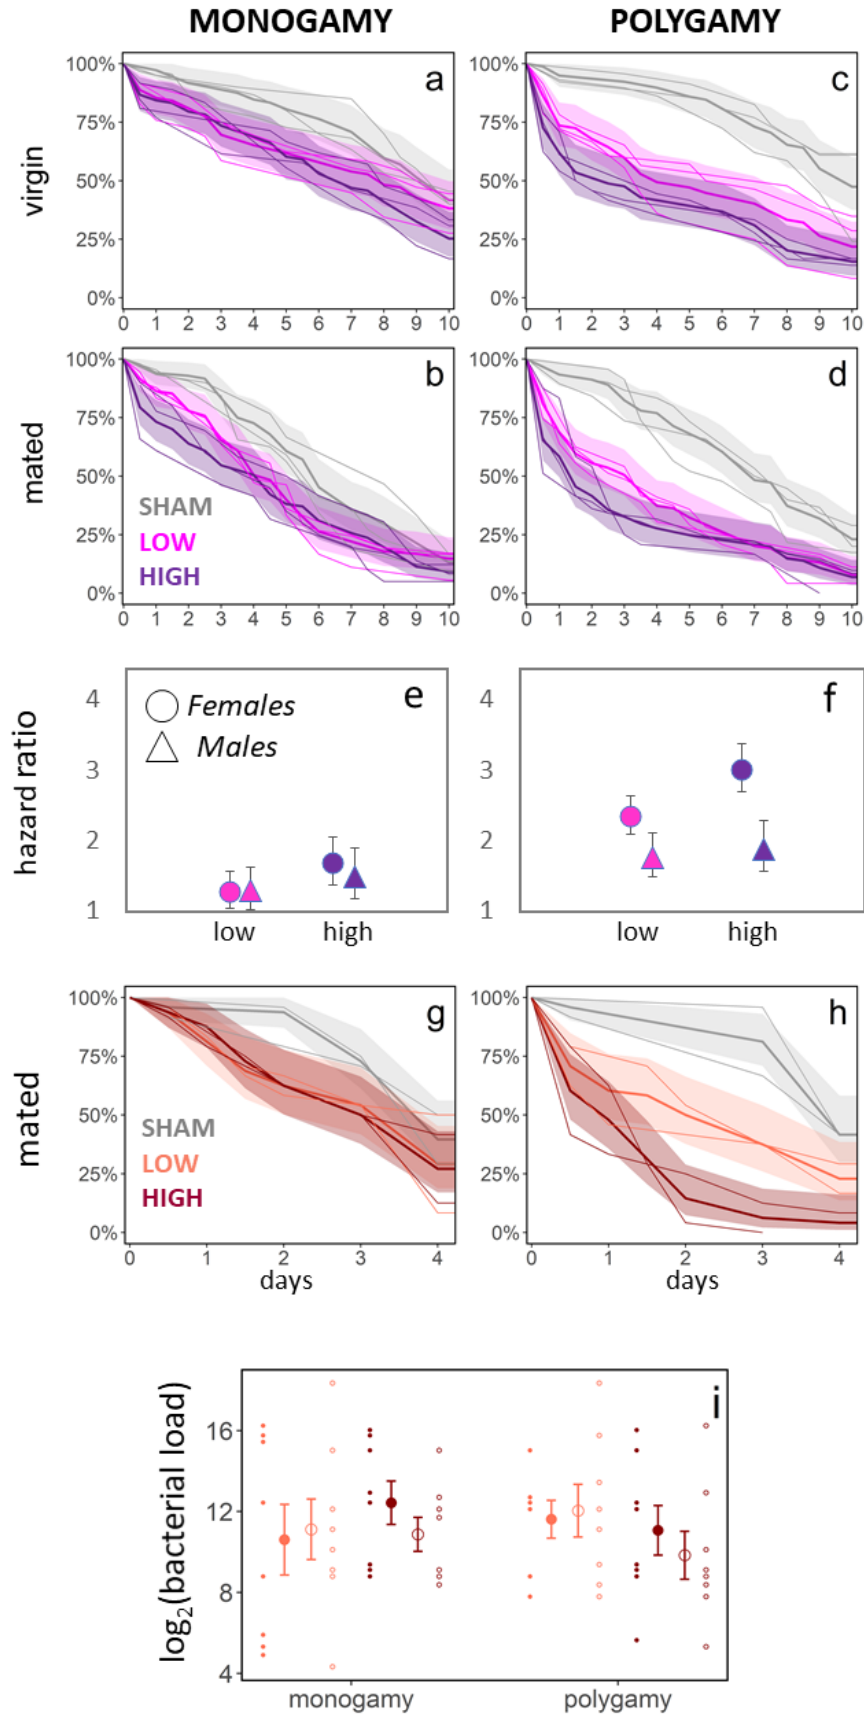

1096

1097 **Figure 4: Microevolutionary change in tolerance to bacterial infection during experimental**  
1098 **evolution under alternative mating regimes.**

1099 Response to bacterial infection was estimated by the change in mortality rate between individuals  
1100 infected with two doses of bacteria and a sham control. When infected with the gram-positive  
1101 bacteria *B. thuringiensis*, monogamous females (**a, c**) had significantly higher survival under infection  
1102 compared with polygamous females (**b, d**), while virgin (**a, b**) and mated (**c, d**) females had similar  
1103 responses. Shown are survival curves for each replicate evolution line (thin lines) together with mean  
1104 survival (thick line) and 95% confidence limits (shaded area) based on all three replicate lines per  
1105 regime and mating treatment. Virgin males (triangles) from monogamous (**e**) and polygamous (**f**)  
1106 regimes did not show the strong differences seen in virgin females (circles), resulting in an apparent  
1107 increase in sexual dimorphism in response to infection in the polygamy regime (compare panel **e** and  
1108 **f**) (means  $\pm$  1SE; lower dose = 1.0 OD, higher dose = 2.0 OD for females and 2.5 OD for males). When  
1109 mated females were infected with the gram-negative bacteria, *P. entomophila*, which allowed  
1110 assaying of in vivo bacterial counts in infected individuals, monogamous lines (**g**) again showed  
1111 higher survival under infection compared with polygamous lines (**h**) (lower dose = 0.5 OD, higher  
1112 dose = 1.0 OD). (**i**) Counts of bacterial loads in females 12h post infection showed that difference in  
1113 survival were likely not due to more efficient clearance of bacteria in monogamous lines. Means  $\pm$   
1114 1SE per replicate line (two lines used per regime and dose) and individual estimates per assay.  
1115

1116

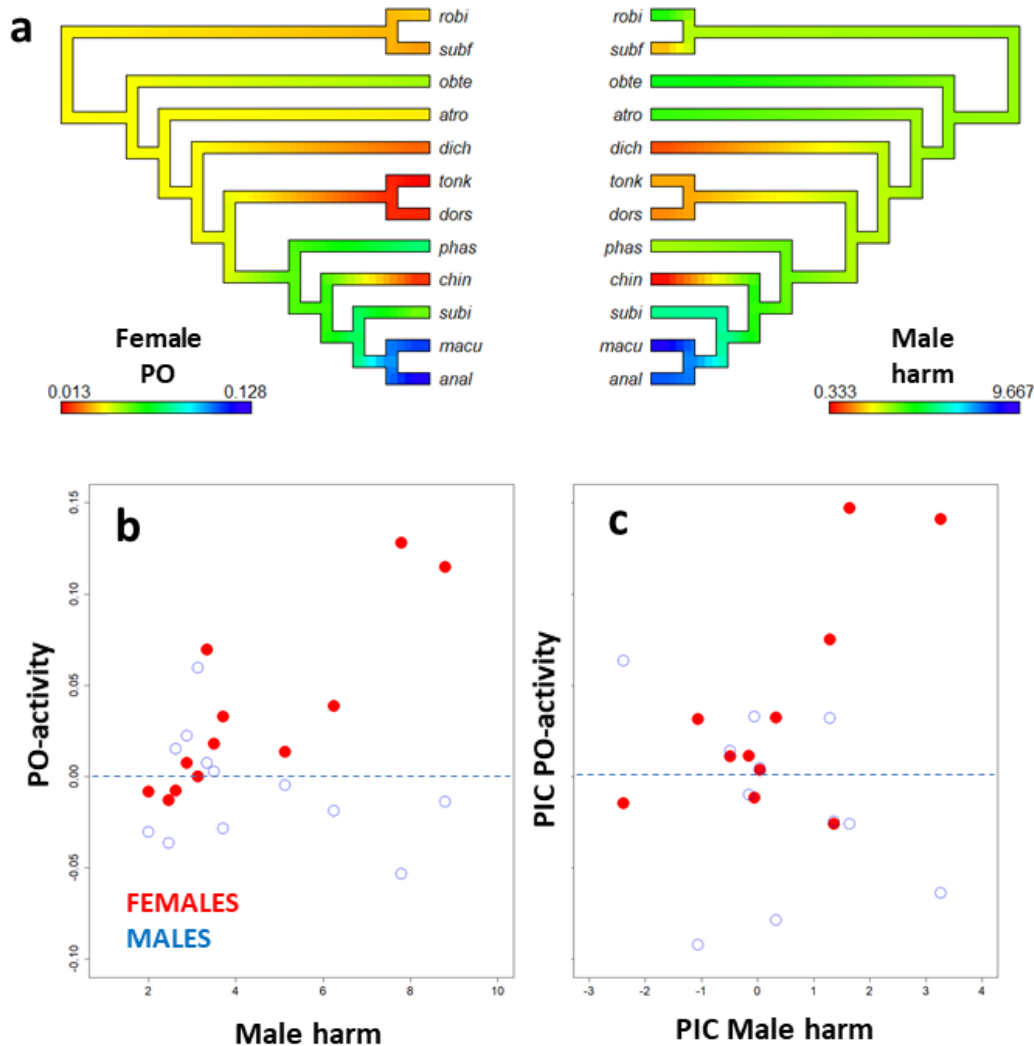

1117

1118 **Figure 5: Phylogenetic covariance between harmfulness of male genital morphology and**  
 1119 **PO activity in virgin male and female seed beetles.**

1120 (a) Female PO activity and the harmfulness of male genitalia mapped on the phylogeny of the 12  
 1121 species used. Scores are given by color from blue (high harm/PO) to red (low harm/PO). Lower panels  
 1122 show correlations across species between male harmfulness and male (blue open) and female (red  
 1123 closed) PO activity, shown as (b) raw tip data and (c) phylogenetic independent contrasts (PICs).  
 1124 Standard errors around each species' mean were typically of the magnitude  $\sim 0.02$  for male and  
 1125 female PO activity, and  $\sim 0.6$  for male genital morphology. The y-axes of (b) and (c) are scaled to have  
 1126 the same range. Species codes represent robi = *Amblycerus robiniae*; subf = *Zabrotes subfasciatus*;  
 1127 obte = *Acanthoscelides obtectus*; atro = *Bruchidius atrolineatus*; dich = *Bruchidius dichrostachydis*;  
 1128 tonk = *Megabruchidius tonkineus*; dors = *Megabruchidius dorsalis*; phas = *Callosobruchus phaseoli*;  
 1129 chin = *Callosobruchus chinensis*; subi = *Callosobruchus subinnotatus*; macu = *Callosobruchus*  
 1130 *maculatus*; anal = *Callosobruchus analis*.

1131

a)

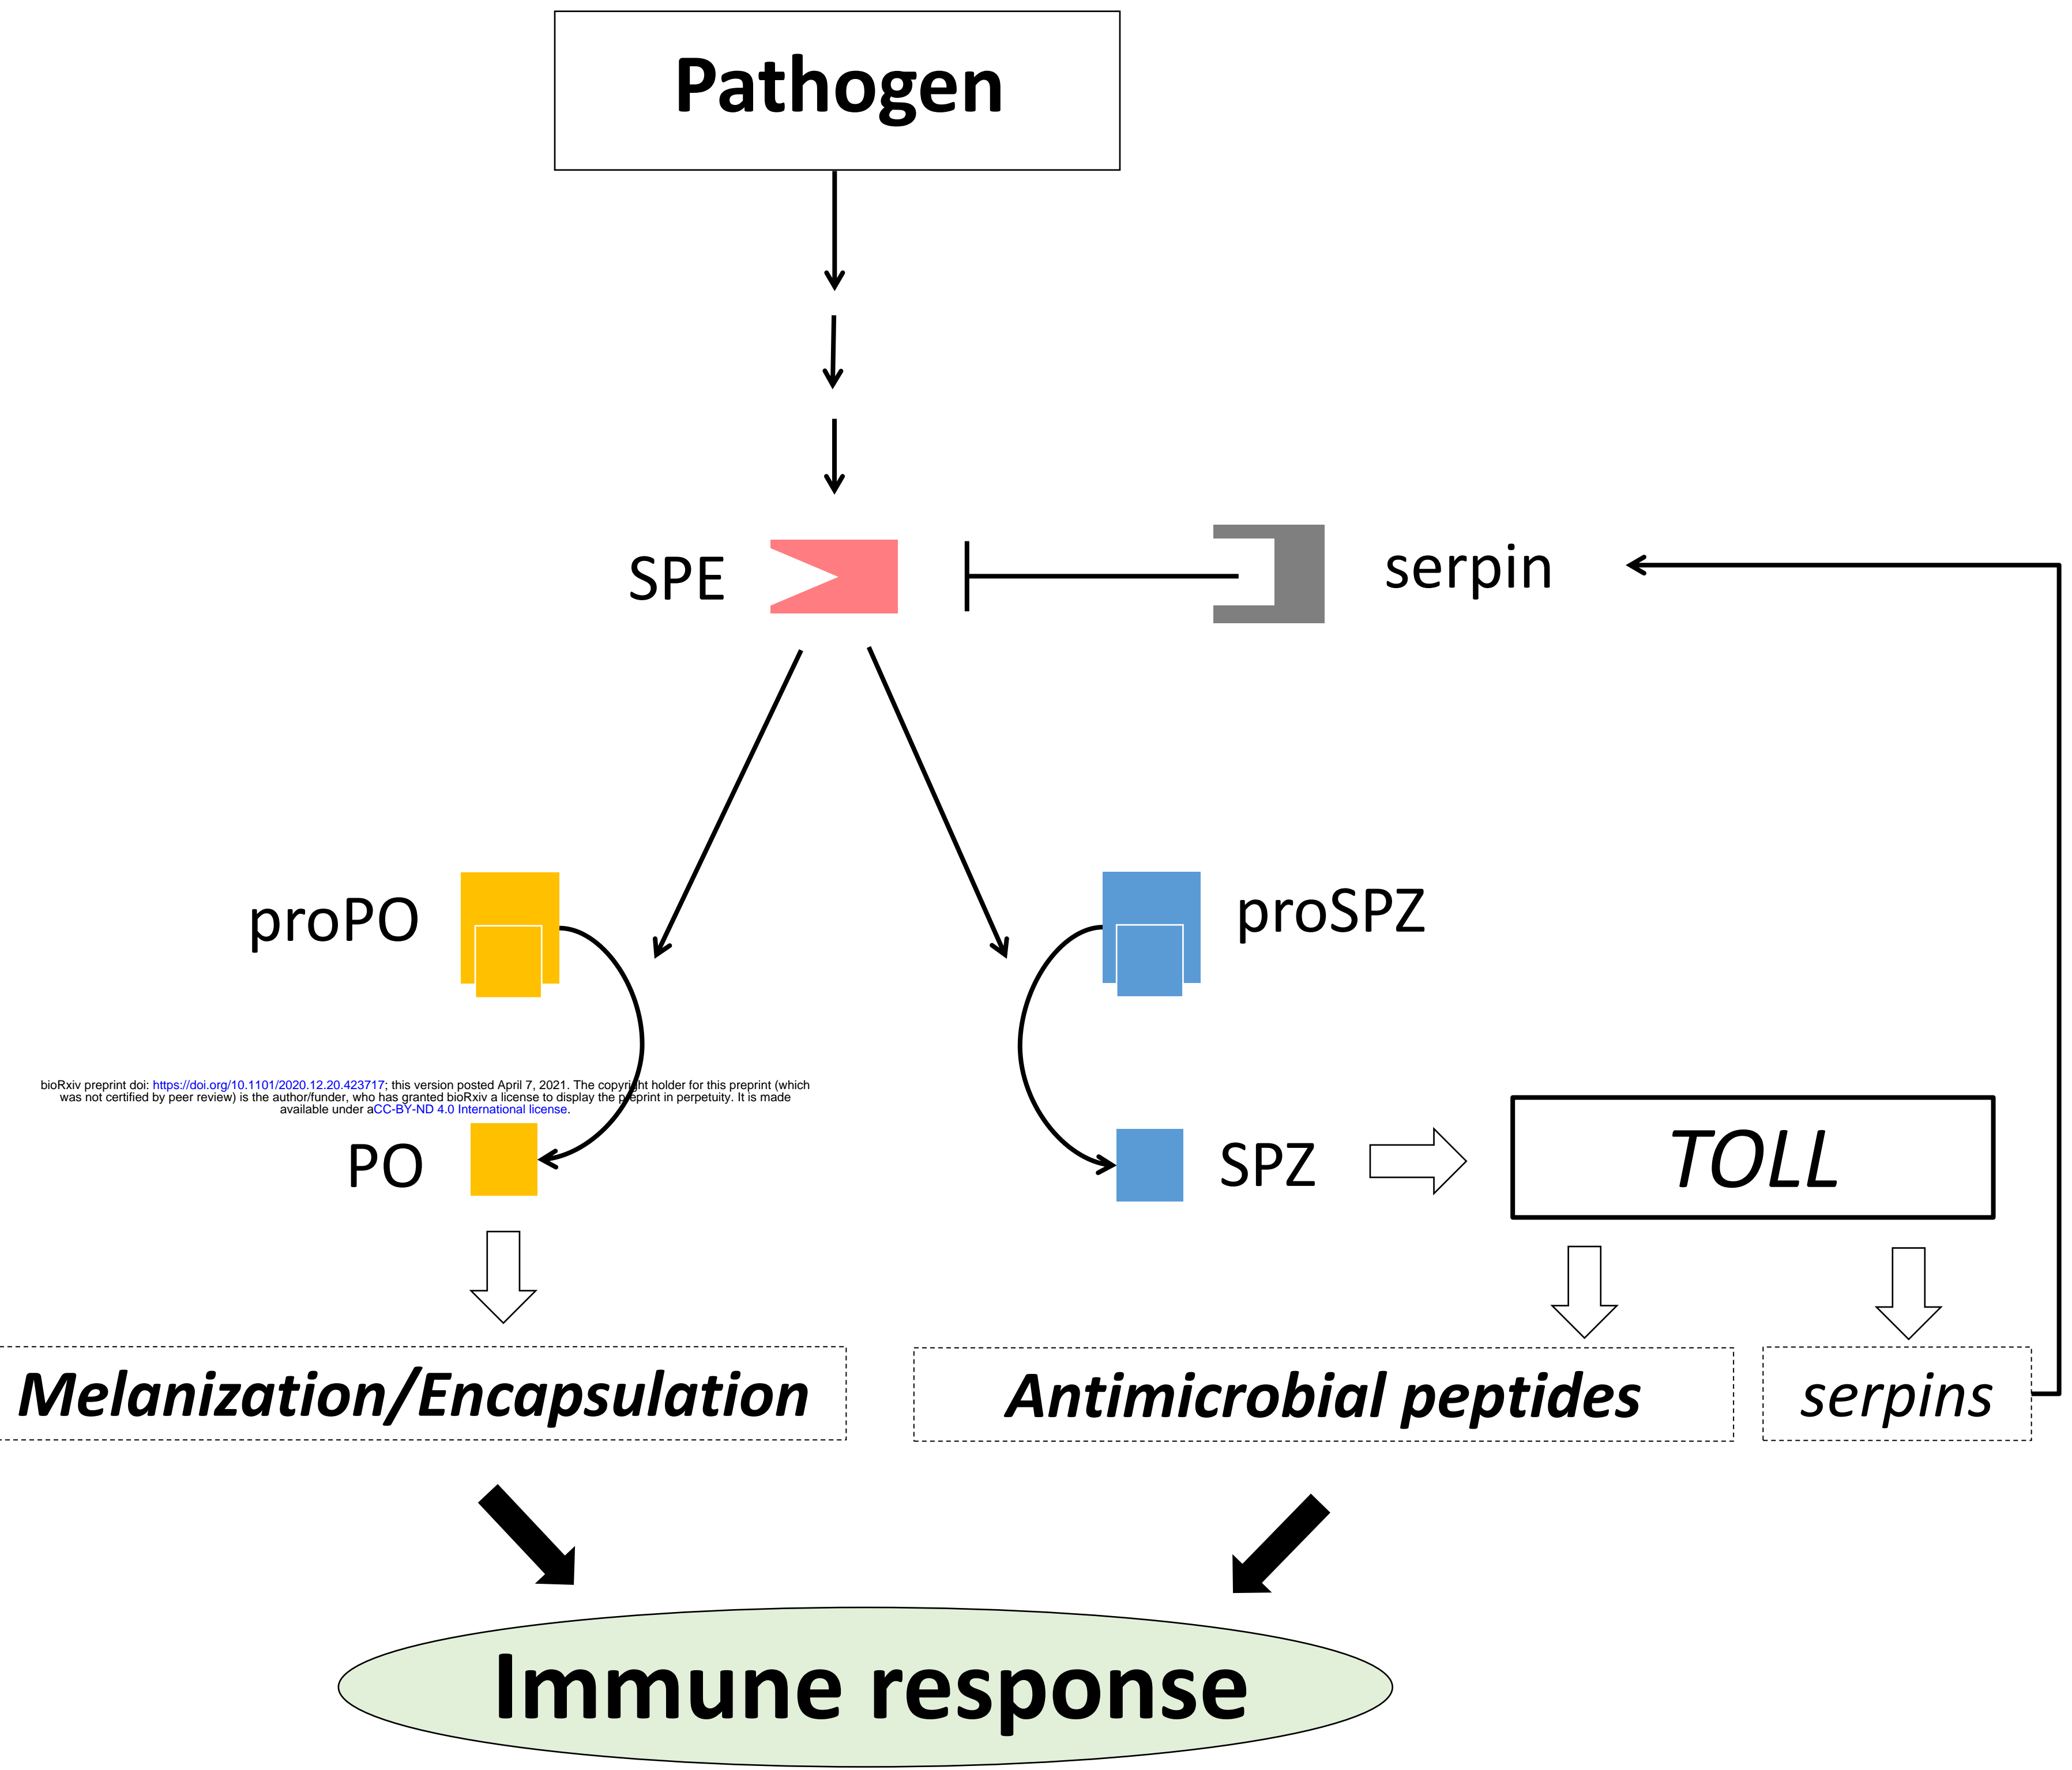

b)

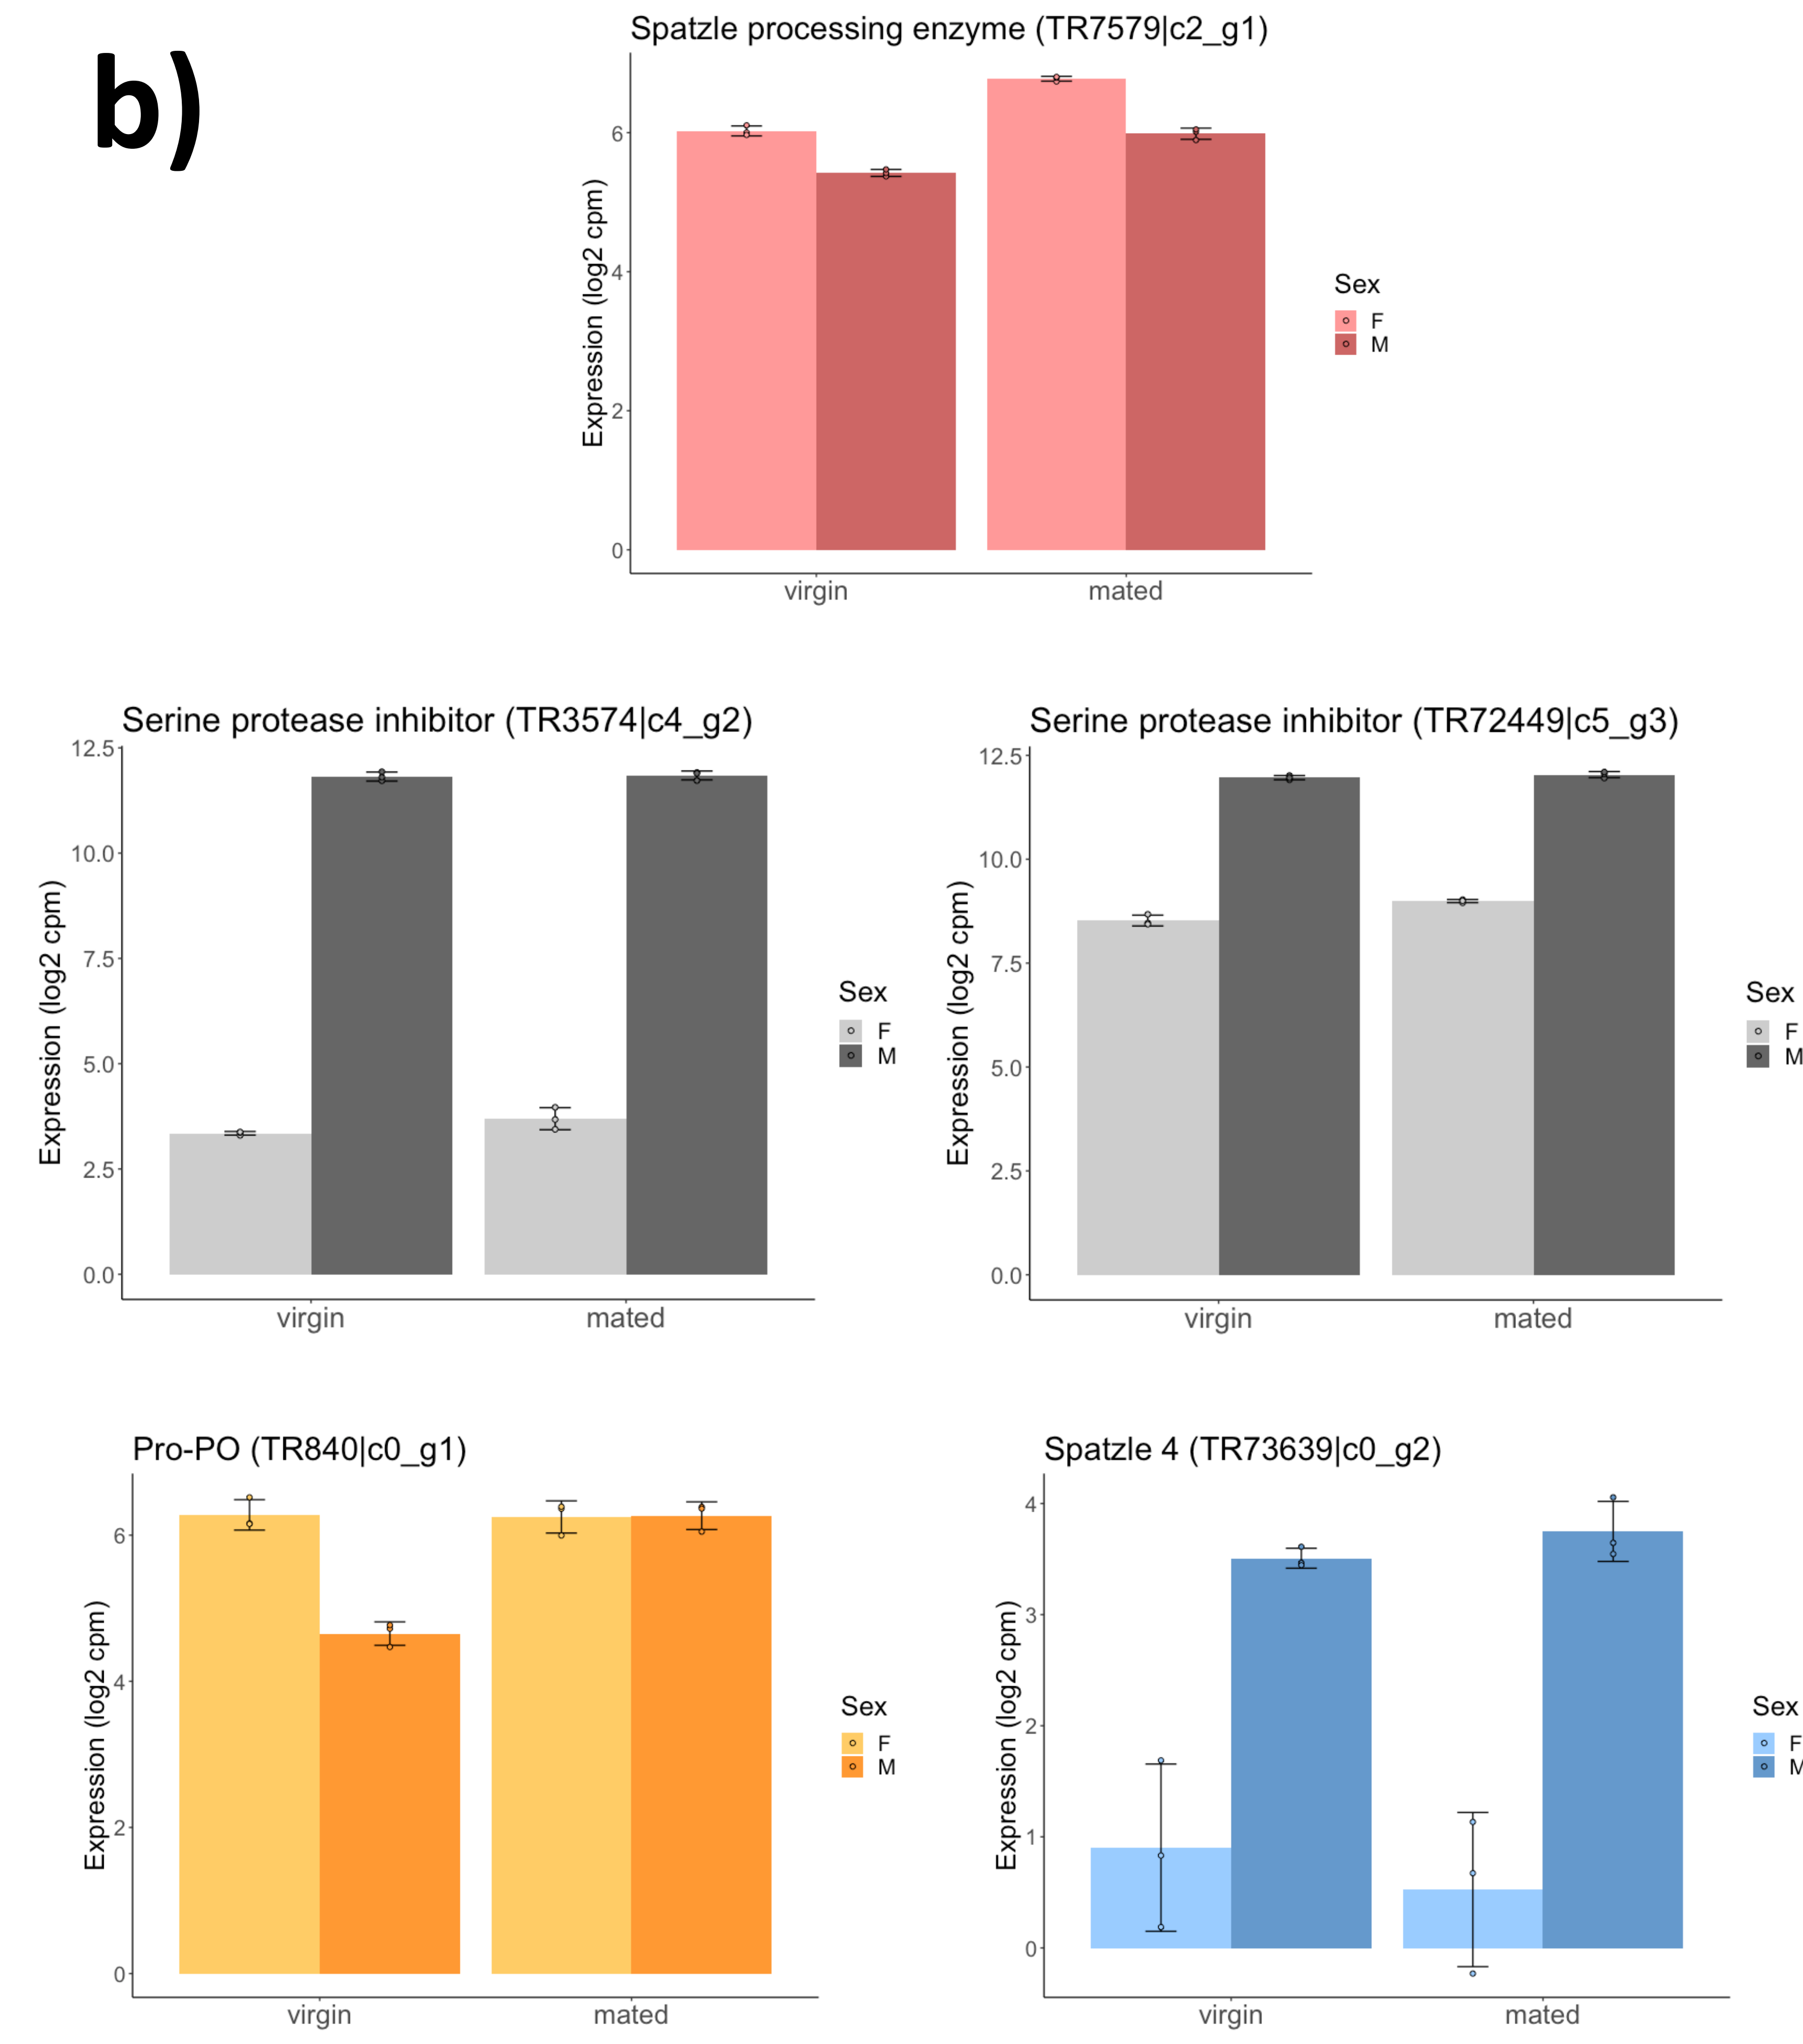



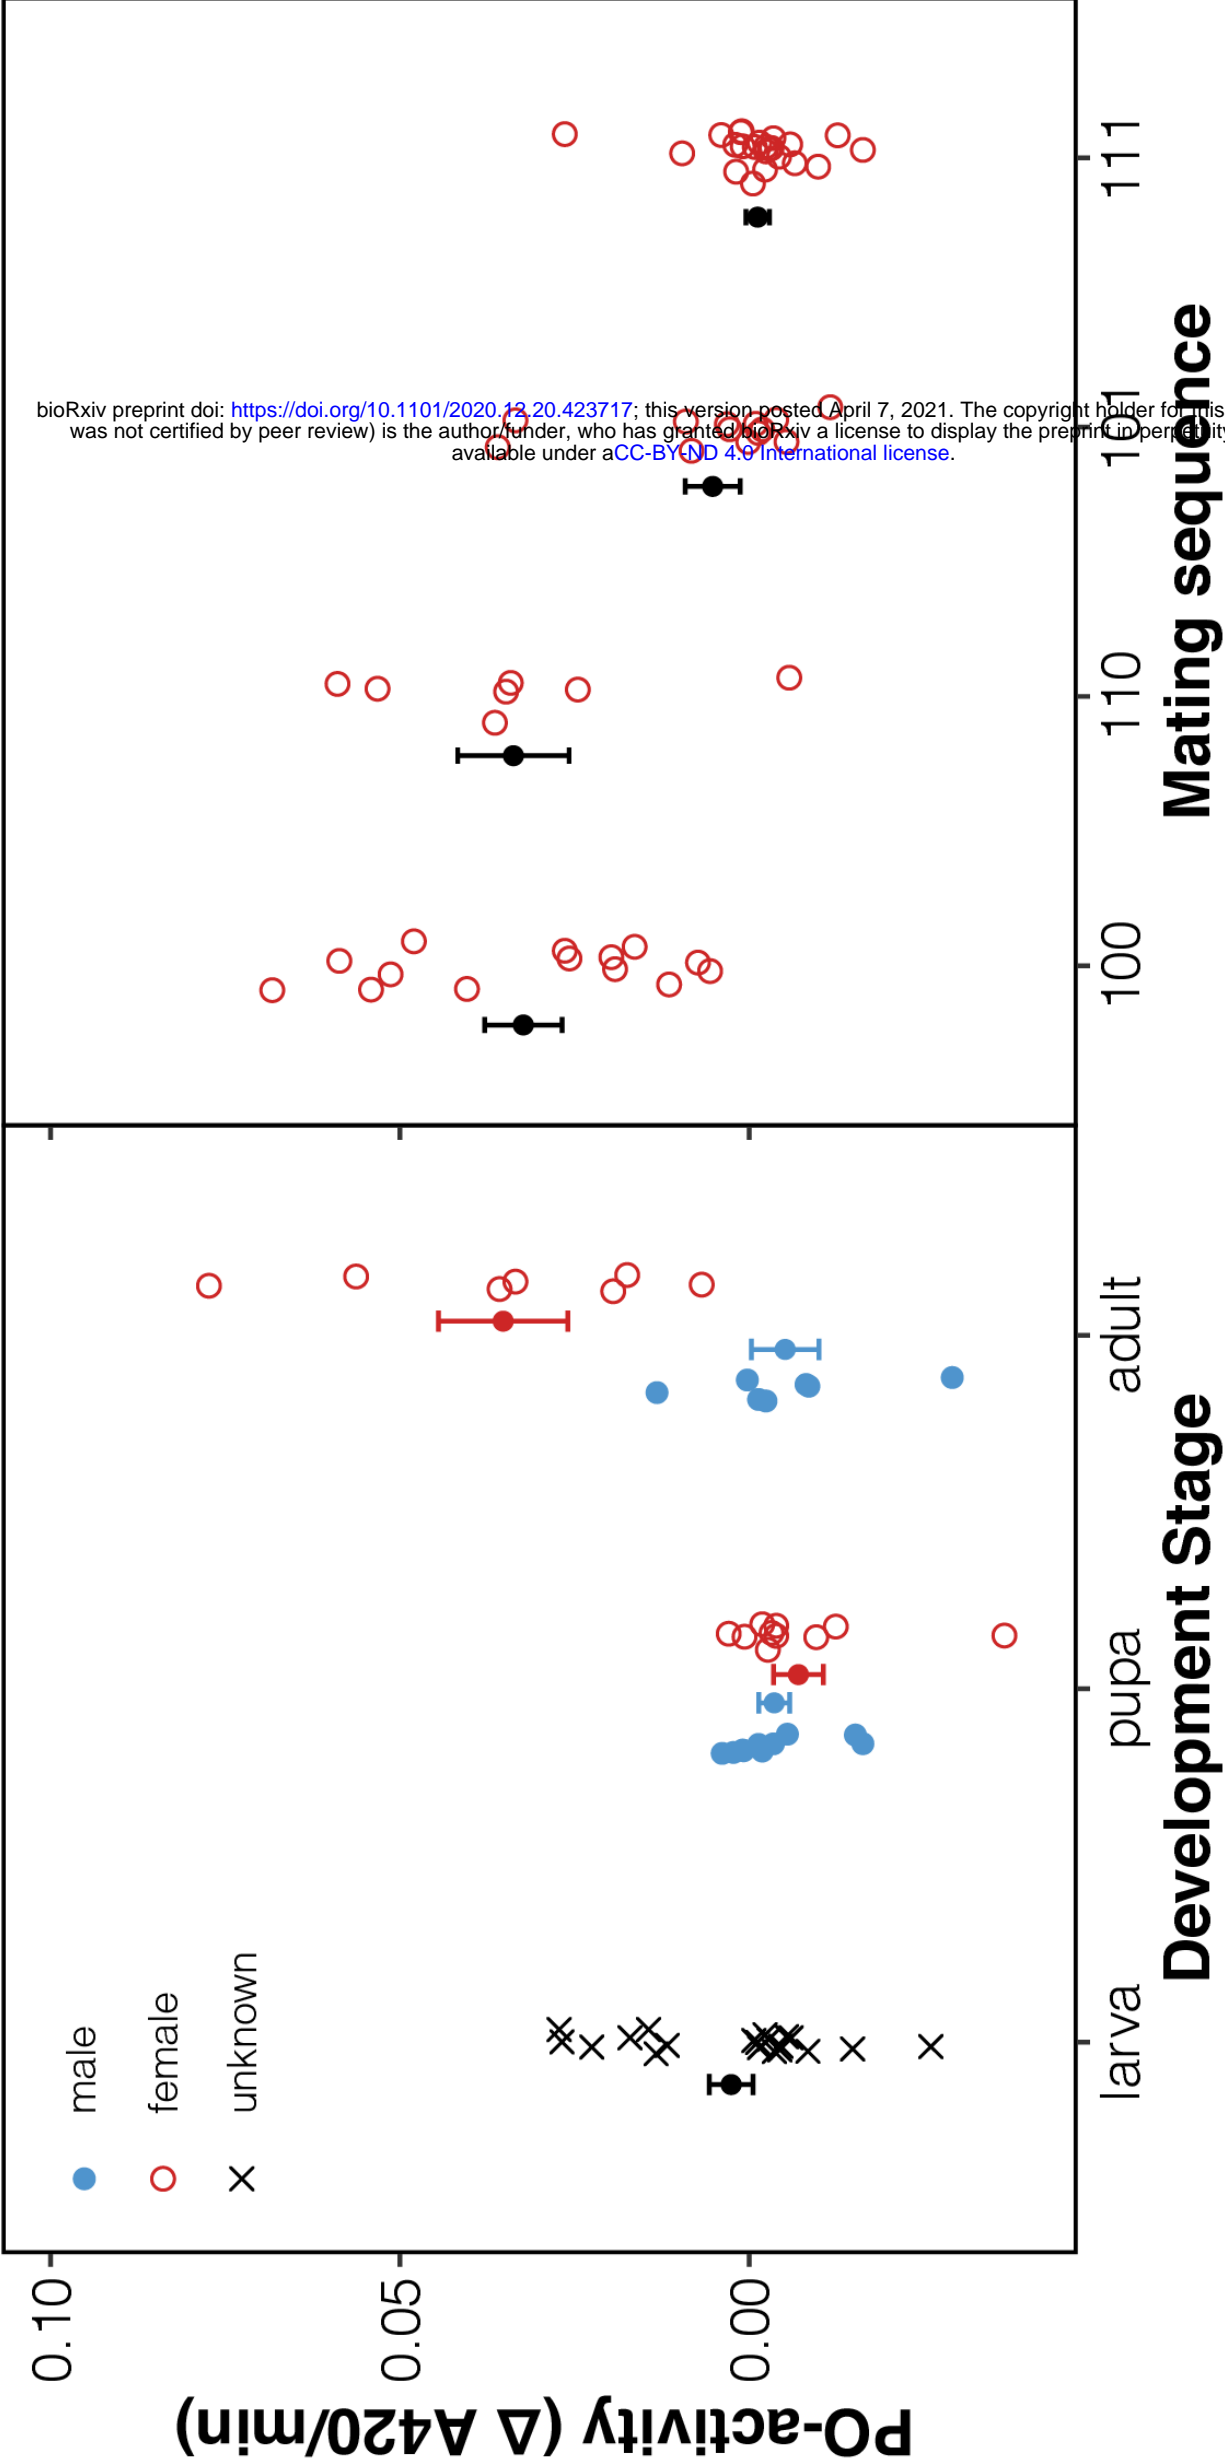

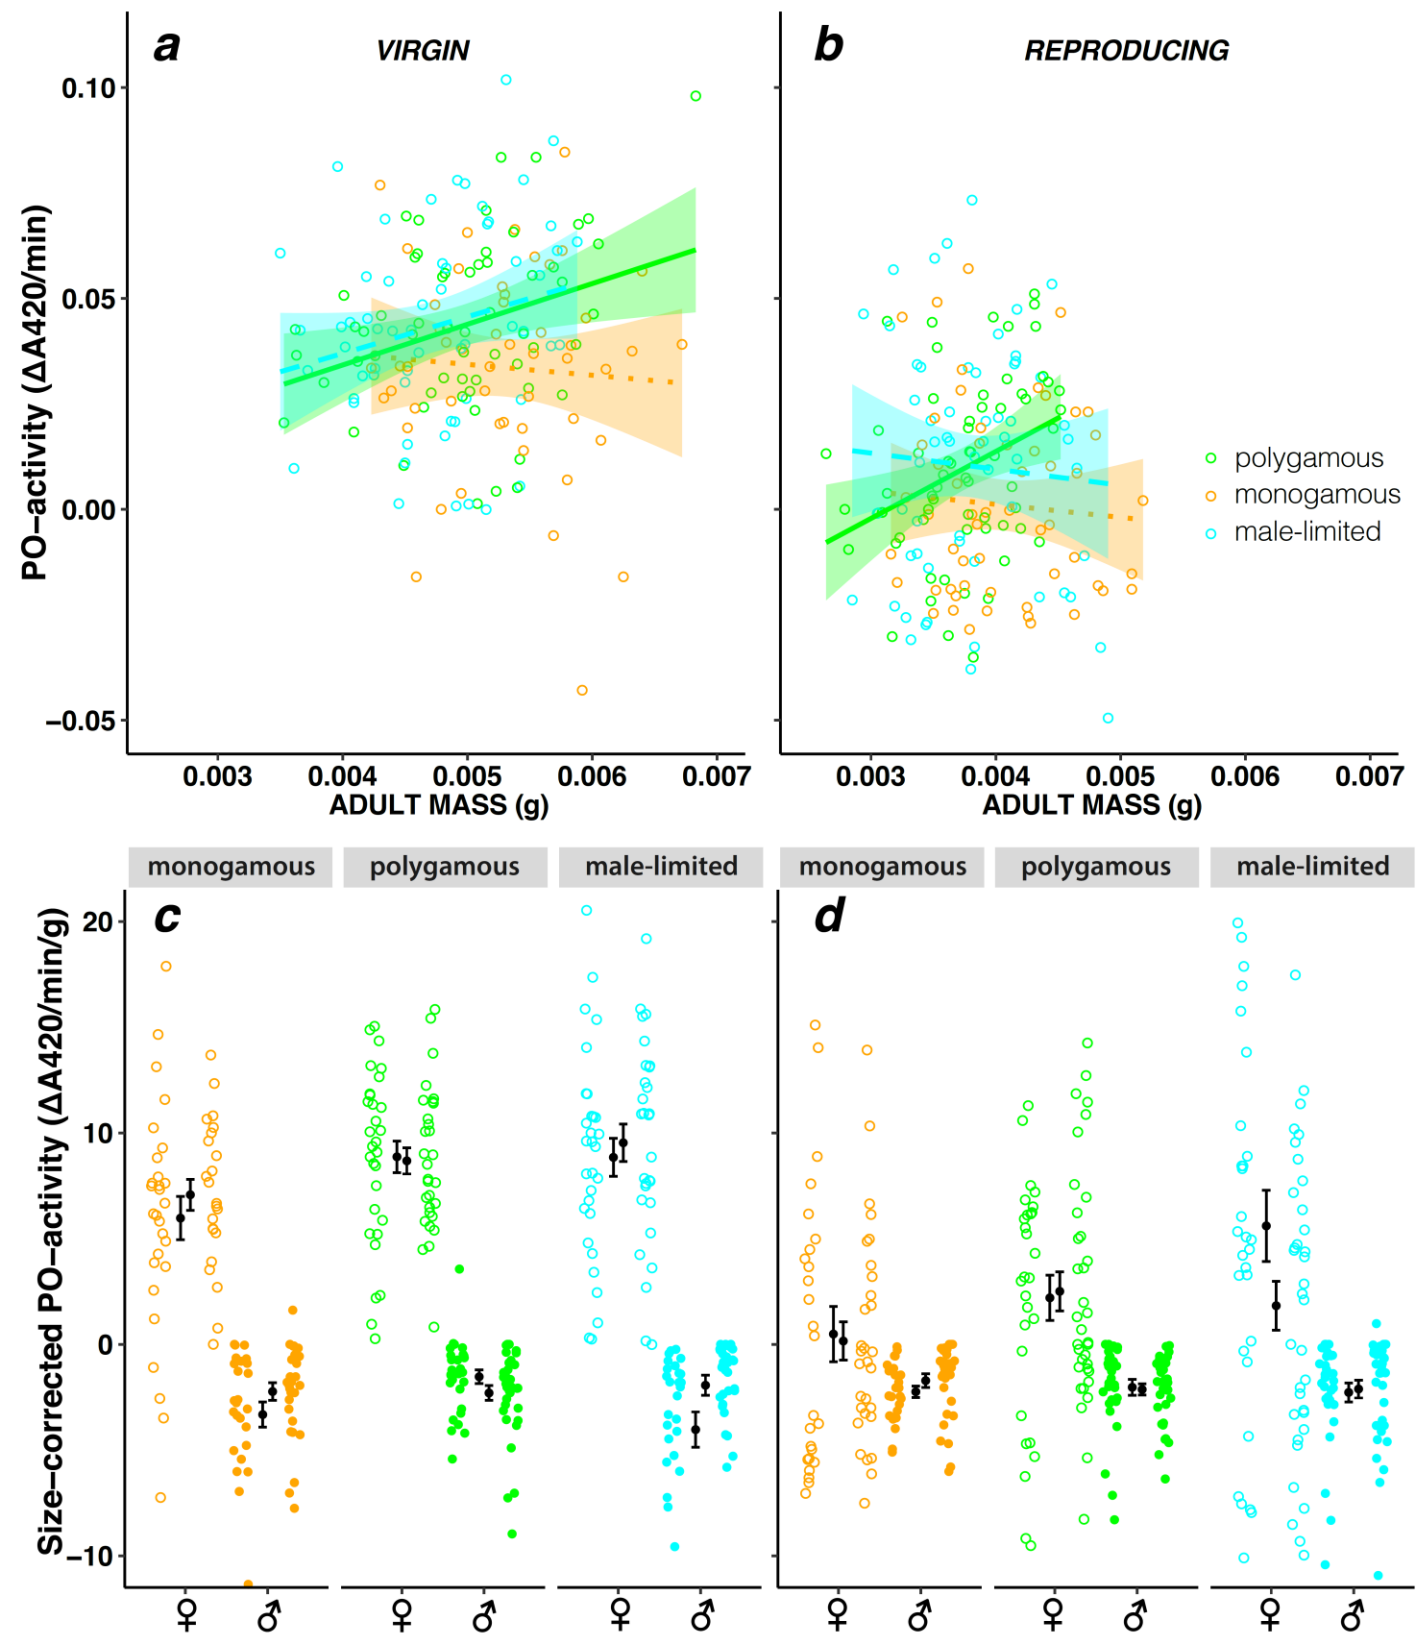

# MONOGAMY

# POLYGAMY

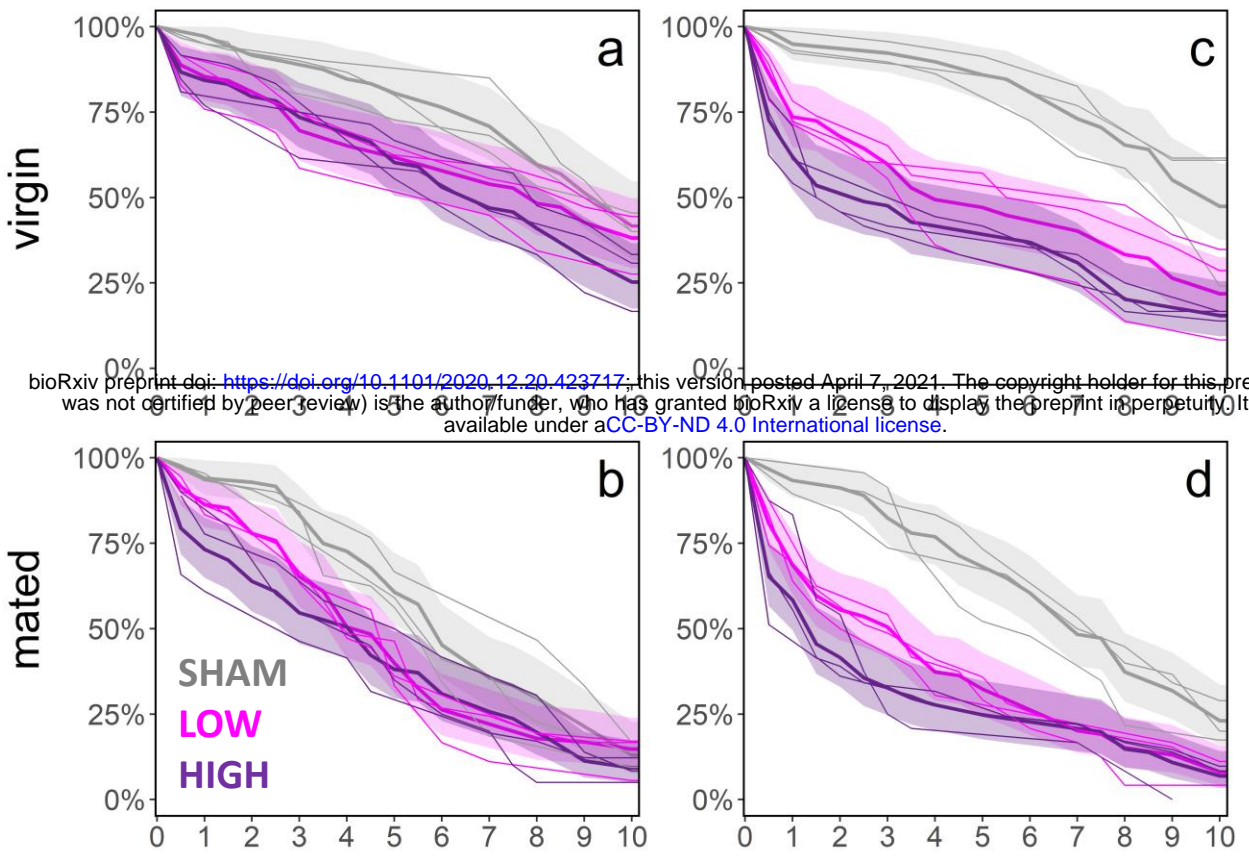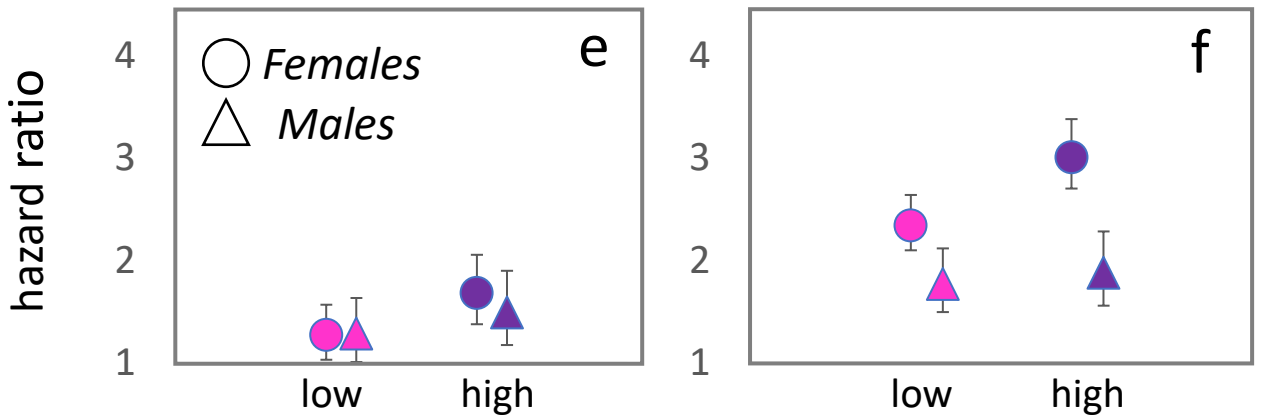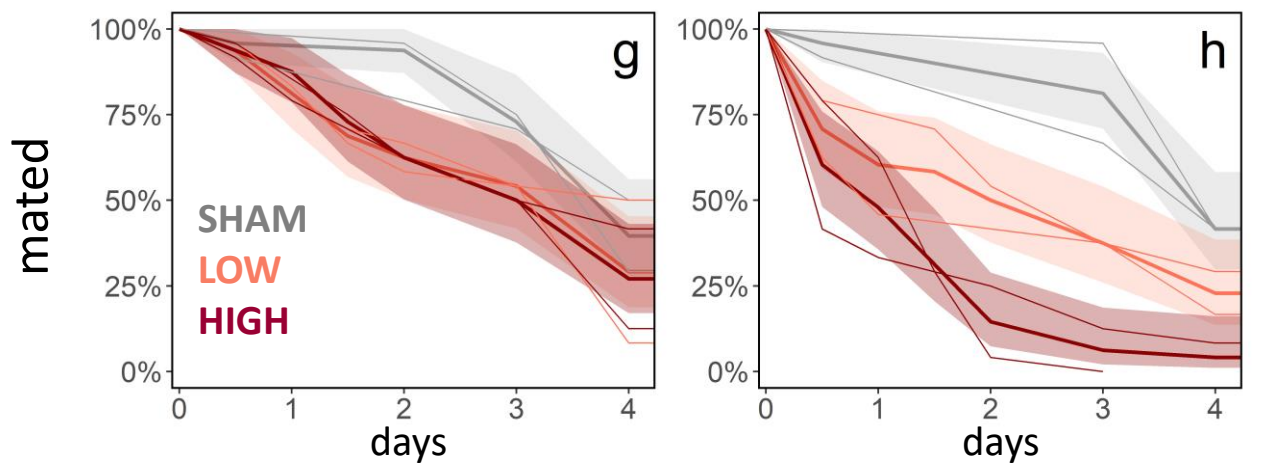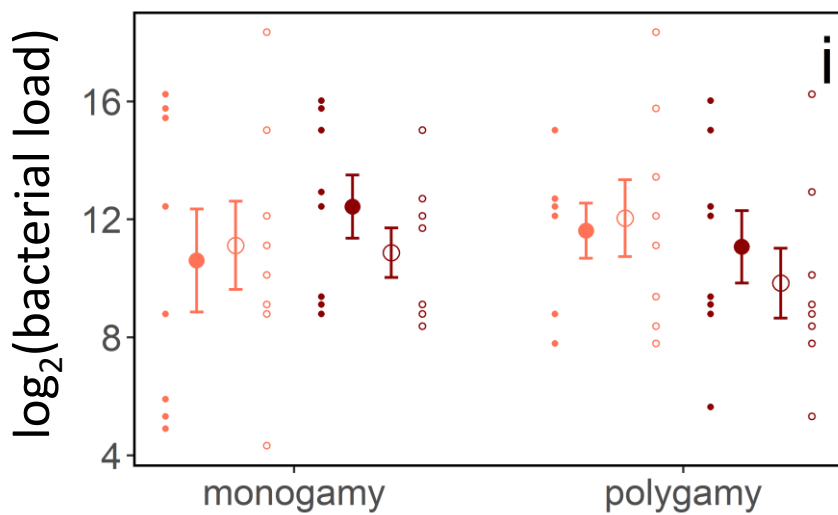

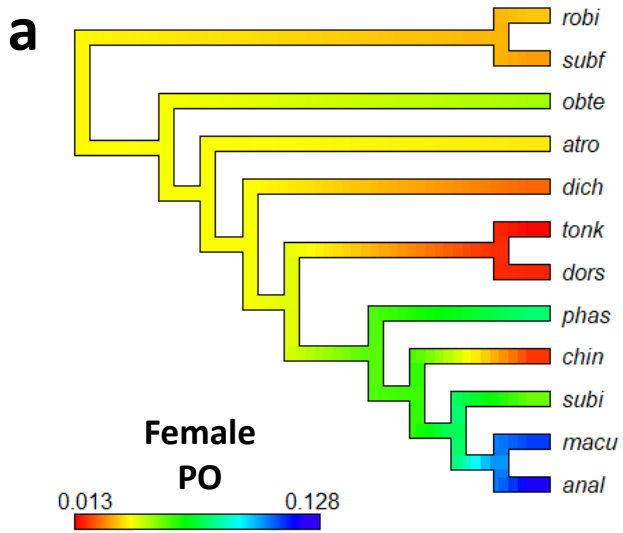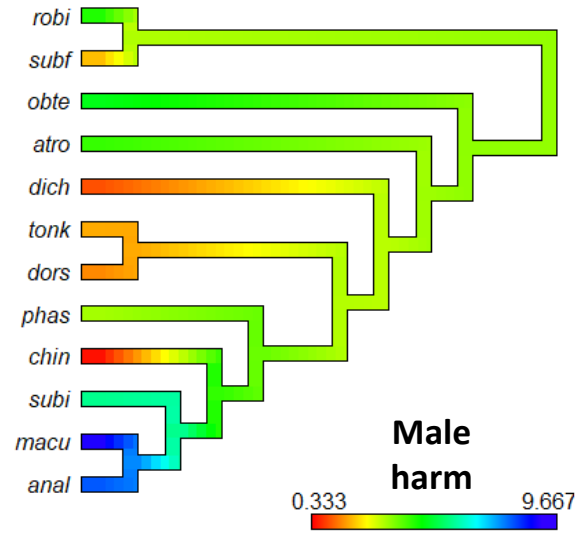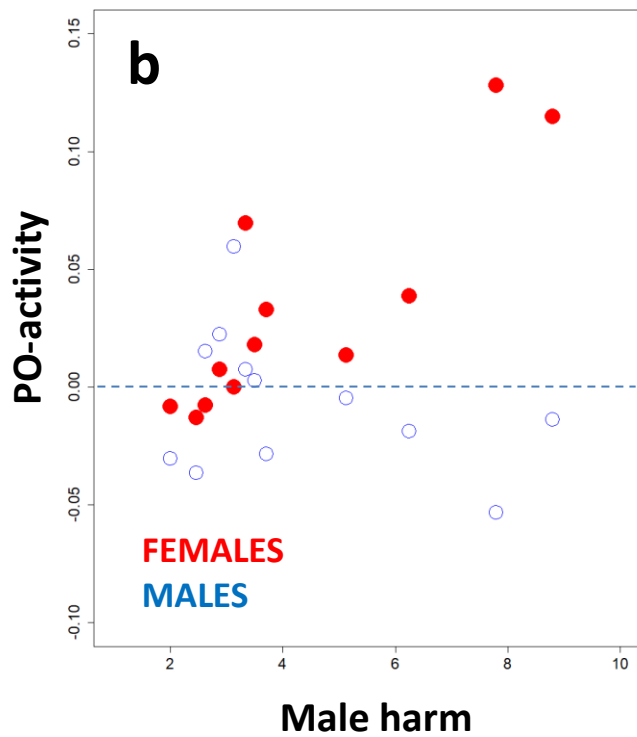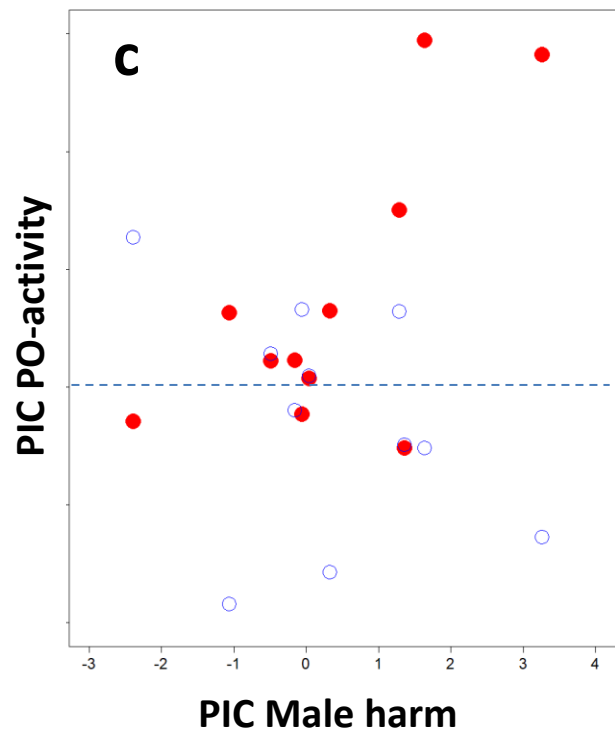

Source: https://www.biorxiv.org/content/10.1101/2020.12.20.423717v2.full.pdf
